# 1 Transcranial focused ultrasound enhances 2 behavioral and network mechanisms 3 underlying response inhibition in humans

4  
5  
6  
7  
8 Justin M. Fine, Maria E. Fini, Archana S. Mysore, William “Jamie” Tyler, Marco Santello

9  
10 Address for correspondence:

11 Justin M. Fine  
12 [justfine@iu.edu](mailto:justfine@iu.edu)  
13 480-299-8845  
14 Psychological and Brain Sciences  
15 1101 E 10th St  
16 Indiana University  
17 Bloomington, IN 47405  
18

19  
20  
21  
22  
23  
24  
25  
26 **Keywords:** Transcranial Focused Ultrasound; Response inhibition; Dynamic Causal  
27 Modeling; Inferior frontal gyrus; Cognitive control; Pars Opercularis; Neuronavigation  
28

29  
30  
31  
32  
33  
34  
35  
36  
37  
38  
39  
40  
41  
42  
43  
44

## Abstract

To prevent erroneous actions, individuals must often inhibit prepared behavioral responses. The right inferior frontal gyrus (rIFG) and its connectivity patterns are prominently implicated as key to behavioral inhibition. However, previous studies have applied neurostimulation methods with low spatial resolution that impede simultaneous network modeling of neural activity. Therefore, direct evidence for inhibitory control in rIFG is lacking, while the accompanying network mechanisms remain unknown. We addressed this gap using a Stop Signal task and transcranial focused ultrasound (TFUS) to pars opercularis in rIFG. TFUS improved stopping performance by enhancing stopping speed. Electroencephalographic dynamic causal modeling indicated inhibition performance increased by TFUS modulating pars opercularis pyramidal neuron connectivity to subcortex. By combining TFUS and network modeling, our results provide causal evidence that response inhibition is implemented along two pathways originating from a direct rIFG to subcortical pathway and a parallel pathway that modulates pre-SMA inhibition onto subcortical nodes.

## Introduction

45  
46 Behavioral inhibition is necessary to suppress impending actions that become  
47 contextually inappropriate (Aron et al., 2014; Baddeley, 1996; Logan and Cowan, 1984).  
48 The control over inhibitory capacities is dramatically reduced in pathologies dominated  
49 by aberrant impulse control, e.g. ADHD (Bari and Robbins, 2013). The stop-signal task  
50 has been widely used as a paradigm for probing inhibition (Logan and Cowan, 1984).  
51 This task involves cueing action execution (Go signal) on every trial. On a percentage of  
52 trials, individuals are cued (Stop signal) to attempt inhibiting responses at a delay after a  
53 Go. This task allows deriving the stop signal reaction time (SSRT), a latent measure of  
54 stopping speed.

55 The predominant conceptual framework implicates a right-lateralized prefrontal  
56 stopping circuit driving inhibition (Aron, Robbins, and Poldrack, 2014; Chambers et al.,  
57 2006), with an anatomical locus in the posterior portion of the right inferior frontal gyrus  
58 (rIFG), pars opercularis (Aron and Poldrack, 2006). It has been argued this area directly  
59 implement motor braking via projections to subcortical nodes (Aron et al., 2014).  
60 Supporting evidence is based on demonstrations that rIFG neural activity is larger in  
61 successful compared to failed stopping (Aron et al., 2006; Boehler et al., 2010; Li et al.,  
62 2006), and both inhibition and SSRTs being altered in individuals with rIFG lesions  
63 (Aron et al., 2003) and ADHD (Morein-Zamir et al., 2014). rIFG is considered a core  
64 node for response inhibition, nevertheless successful inhibition also engages a broader  
65 network that includes pre-supplementary motor area (pre-SMA; Duann et al., 2009),  
66 subthalamic nucleus (STN) and striatum (Aron et al., 2007; Mallet et al., 2016).

67           Although modulation of RIFG activity typically accompanies inhibitory control,  
68 several researchers have proposed RIFG's involvement is indirect (Duann et al., 2009;  
69 Sharp et al., 2010; Xu et al., 2017). This indirect role involves rIFG registering a stop-  
70 signal context, and signaling the context to pre-SMA, which has been argued to  
71 explicitly trigger inhibition (Duann et al., 2009; Sharp et al., 2010; Rae et al., 2015). At a  
72 network level, this hypothesis has gained support from fMRI connectivity in stop-signal  
73 studies wherein pre-SMA alone exhibited modulated connectivity with subcortical  
74 structures during successful inhibition (Duann et al., 2009; Rae et al., 2015). However,  
75 other connectivity studies have implicated both rIFG and pre-SMA connectivity to STN  
76 and striatal pathways as predicting inhibition speed (Jahfari et al., 2011; Xu et al.,  
77 2017). Additionally, primate research implies that direct neural projections to the STN  
78 originate in both the rIFG and pre-SMA, with the STN acting as an integrator (Haynes  
79 and Haber, 2013). These dual-pathway models leave open the possibility that rIFG can  
80 directly trigger inhibition in parallel with pre-SMA (Aron et al., 2016).

81           In contrast to the above conclusions, an alternative framework posits that neither  
82 rIFG or pre-SMA directly implement inhibition, with inhibition emerging from attentional  
83 orienting and biased competition processes (Hampshire and Sharp, 2015; Chatham et  
84 al., 2012). This proposition is based on findings indicating sectors of rIFG are  
85 equivalently active during stop-signal and other putatively non-inhibitory tasks (Erika-  
86 Florence et al., 2014; Hampshire et al., 2010; Xu et al., 2017). For example, rIFG  
87 activity scales with stimulus probability (Shulman et al., 2009) and regularly during tasks  
88 requiring attentional re-orienting (Vossel et al., 2006; Levy and Wagner, 2011). The  
89 claim that attentional orienting drives response inhibition is supported primarily by

90 demonstrating rIFG fMRI activity is equivalent during both stop-signal tasks and other  
91 tasks with no apparent inhibitory demands (Sharp et al., 2010). In this framework  
92 (reviewed in Hampshire and Sharp, 2015), inhibition could occur through rIFG top-down  
93 signals that bias attentional processing through increasing synaptic efficacy of sensory  
94 cortices (Hampshire, 2015; Feldman and Friston, 2010).

95         Given the prevalence of findings supporting either a direct or indirect role of rIFG  
96 in response inhibition, or the absence of behavioral inhibition processes altogether,  
97 delineating between alternative mechanisms has remained inconclusive. For example,  
98 an established way to control for attentional demands is comparing neural activity  
99 during a stop-signal and putatively non-inhibitory tasks. However, a notable issue with  
100 this comparison is that other tasks may still induce unaccounted for cognitive processes  
101 or latent inhibitory demands not directly measurable in behavior (Aron et al., 2014).  
102 Given the ambiguity introduced by comparing tasks to parcellate neural activity  
103 underlying inhibitory versus other cognitive demands, direct approaches are needed to  
104 circumvent these issues.

105         Neurostimulation during inhibitory tasks offers a potential in-route to identify how  
106 rIFG, and particularly pars opercularis, is causally involved in motor braking, while  
107 detailing its role in the broader inhibition network. Respectively, several studies have  
108 applied transcranial magnetic (TMS; Cai et al., 2012; Obeso et al., 2013; Verbruggen et  
109 al., 2010) or direct current (Jacobson et al., 2011) stimulation during inhibition tasks.  
110 Some studies found offline TMS applied to either rIFG or pre-SMA impaired or improved  
111 inhibition performance (Chambers et al., 2006; Verbruggen et al., 2010), respectively.  
112 However, others have shown pre-SMA TMS can either improve inhibition with no effect

113 on rIFG (Obeso, 2013). Limitations of previous human neurostimulation response  
114 inhibition studies include either lack of neural activity measurements or limited spatial  
115 accuracy (Opitz et al., 2013). For example, TMS applied to rIFG during inhibition tasks  
116 most likely engaged ventral premotor areas involved also in action switching (Buch et  
117 al., 2010). The implication is that, if rIFG is potentially involved in attentional orienting,  
118 inhibitory control, or both, these neurostimulation approaches likely elicited broad  
119 effects on these processes. Therefore, it remains to be causally established that rIFG  
120 and, more importantly, pars opercularis, engage an explicit motor inhibition mechanism  
121 embedded in its connectivity that operates alongside attentional mechanisms (Munkata  
122 et al., 2011; Wiecki and Frank, 2013).

123         Here, we employed MRI-guided, neuronavigated transcranial focused ultrasound  
124 stimulation (TFUS) directly to the pars opercularis of the rIFG while humans performed  
125 a stop-signal task. TFUS is a stimulation technique with a millimeter spatial resolution  
126 (Fini and Tyler, 2017). Neural activity underlying response inhibition was assessed with  
127 EEG event-related potentials (ERPs) and source analysis. Using this approach allowed  
128 us to delineate the specific role of pars opercularis, while detailing which ERPs and  
129 network functions are directly related to inhibition success and its speed (SSRT). TFUS  
130 to pars opercularis significantly improved response inhibition through a targeted effect of  
131 shortening SSRT. To determine how TFUS altered biophysical mechanisms generating  
132 neural activity underlying inhibitory mechanisms, we built dynamic causal models  
133 (DCM) of ERPs using microcircuit models. The main network hypothesis was that an  
134 explicit rIFG inhibition mechanism would be embodied in direct rIFG-to-subcortical  
135 connectivity weighting that directly reflects TFUS-induced changes in stopping efficiency

136 (SSRT). We confirmed this hypothesis by demonstrating TFUS directly altered rIFG  
137 connectivity to a hidden subcortical node. In addition, DCM also indicated that only No-  
138 TFUS successful versus failed stopping, rather than successful stopping in general,  
139 were differentiated by mechanisms linked to network mechanisms associated with  
140 attentional modulation, i.e., recurrent synaptic superficial gain of visual cortex.  
141 Importantly, these results support the proposal that rIFG is directly involved in  
142 implementing an explicit response inhibition function and stopping efficiency.

## 143 **Methods**

### 144 **Participants**

145 Participants consisted of healthy adult volunteers and were divided into one of  
146 three experimental groups. The main experimental group received transcranial focused  
147 ultrasound (TFUS) stimulation to the right inferior frontal gyrus (rIFG) (n = 25; 19 males,  
148 mean age 24.1 yrs SD 3.2 yrs). A second group was used as cortical site, active control  
149 group. These participants received stimulation to the ipsilateral somatosensory cortex  
150 (S1) (n = 23; 15 males, mean age 22.4 yrs. SD = 3.3 yrs). A third group received a  
151 sham stimulation near the right temple (n = 15; 8 male, mean age 24.2 yrs SD = 2.8 yrs)  
152 and was used as control for possible auditory effects of TFUS over rIFG (sham rIFG).  
153 All individuals were right-handed and received financial compensation for participation  
154 in the study. Before being enrolled, each subject was screened for neurological  
155 disorders and previous history of epilepsy, stroke, or brain injury. Furthermore, a  
156 neurologist from the Barrow Neurological Institute (Phoenix, AZ) screened all subjects'  
157 T1 scans after structural MRI acquisition, and before participation in the study.

### 158 **Stop Signal Task and TFUS design**

159           The current study used the conventional Stop Signal Task that involved both ‘Go’  
160 and ‘Stop’ trials (Fig. 1A). We presented the experiment using Opensesame (Mathôt et  
161 al., 2012). Each trial started with a centrally-located fixation cross on the monitor. In  
162 both trial types, the fixation cue was replaced by a green ‘Go’ circle ( $3^\circ \times 3^\circ$  visual  
163 angle), with an exponentially-distributed time interval (mean: 500 ms; standard  
164 deviation: 50 ms). Subjects were instructed “to press the up key as soon as they  
165 detected the Go circle” (top panel, Fig. 1A). In ‘Go’ trials, the circle vanished when the  
166 button was pressed or after 800 ms had passed from the fixation cross stimulus. In  
167 ‘Stop’ trials, the stop was a red square which appeared around the green circle (middle  
168 and bottom panel, Fig. 1A). If the subject successfully inhibited his/her response with  
169 respect to the Stop cue within 800 ms, the red square was extinguished, and the trial  
170 was considered a successful inhibition. The time required to inhibit a response following  
171 the Stop signal is defined as stop signal reaction time (SSRT) (see below). The timing of  
172 the Stop cue relative to Go cue, i.e., the stop signal delay (SSD), was presented at one  
173 of four fixed, but subject-specific SSDs. The SSDs were designated by having each  
174 subject first perform a practice block of 50 Go trials only to determine their baseline Go  
175 reaction time (RT). After this block, the 4 SSD levels were set to 25, 35, 75 and 95% of  
176 the mean Go RT. These SSDs were fixed throughout the experimental session. Using a  
177 set of fixed SSDs allowed us to calculate the SSRT using routines that are less  
178 susceptible to low trial numbers (Matzke et al., 2013; see Data processing). Additionally,  
179 we sought to determine the effects of online TFUS at different SSDs to estimate the  
180 effects of stimulation on neural and behavioral responses at different stages of a Go  
181 process predicted by response inhibition models (Verbruggen and Logan, 2009). All



182 trials were separated by an inter-trial interval of 2000 ms ( $\pm 300$  ms randomly drawn  
183 jitter).

184 TFUS was delivered either simultaneously with (1) the Go signal in both Go and  
185 Stop trials, or (2) the Stop signal (Fig. 1A). The purpose of delivering TFUS during Go  
186 trials was to determine the neural and behavioral effects of TFUS to rIFG independent  
187 of a stopping signal. Specifically, this allowed us to assess whether any effects of TFUS  
188 on stopping behavior are related merely to alteration of the timing of an underlying Go  
189 process. Therefore, we used 5 types of trials. The first two consisted of Go trials with no  
190 TFUS or with TFUS locked to the Go cue (No-TFUS and Go-TFUS trials, respectively).  
191 The other three trials consisted of Stop trials: No-TFUS trials, Go-TFUS, and TFUS  
192 locked to the Stop signal (Stop-TFUS). These three types of Stop trials were examined  
193 across the four SSDs.

194 TFUS delivery for Stop trials was evenly distributed across the 4 SSD levels. The  
195 overall probability of a stop trial was set to 35% of all trials (Fig. 1B). We chose this level  
196 to accommodate the need for large amounts of Stop trials required to examine the  
197 effects of TFUS on Stop trials across all SSD levels, while still making Go trials more  
198 frequent. Each experimental session consisted of 1200 trials distributed across 12  
199 blocks. Blocks were segmented into stimulation and no-stimulation blocks; the former  
200 containing trials with and without stimulation, and the later containing no stimulation.  
201 Trial types (Go and Stop trials) were randomly and evenly distributed throughout the  
202 experiment. The trial numbers were chosen to enable the comparison between TFUS  
203 and non-stimulation trials across successful and failed inhibition trials, while allowing a  
204 reasonable number of trials to be performed without inducing significant fatigue to the

205 participants. The block design, as well as the use of an active-stimulation and sham  
206 control groups was chosen to mitigate any possible carry-over effects of the stimulation  
207 across trials.

## 208 **EEG acquisition**

209 EEG was recorded using a 64-channel ActiCap system (BrainVision, Morrisville,  
210 NC), with a standard 10–20 layout. Data was recorded at a sampling rate of 5 kHz, with  
211 resolution 0.1  $\mu$ V and bandpass filter of 0.1–100 Hz. Impedances were always kept < 5  
212 k $\Omega$ . Online recordings utilized a ground at AFz and left mastoid reference. At the  
213 beginning of each session, electrode layouts with respect to each individual's head  
214 shape were registered using a CapTrak camera system (BrainVision, Morrisville, NC)  
215 with the left and right preauricular, and nasion as fiducial landmarks. This allowed for  
216 later co-registration with each individuals T1 structural MRI scan and for source-  
217 localized analysis (see Data Processing).

## 218 **Structural MRI acquisition (T1) and processing**

219 For purposes of TFUS neuronavigation and co-registering EEG electrode  
220 placement, we obtained a structural T1 MRI scan for each participant. T1 volumes were  
221 collected using an 3D MPRAGE sequence (TR = 2300 ms, TE = 4.5 ms, 1 x 1 x 1.1  
222 mm<sup>3</sup> voxels, field of view 240 x 256 mm<sup>2</sup>, 180 sagittal slices) in a Philips Ingenia 3T  
223 scanner with a 32-channel head coil. Brainsuite was used to process T1s, which  
224 included cortical extraction sequence and a surface label-registration procedure with the  
225 BCI-DNI atlas. After labeling, we checked the locations and created a mask of either  
226 pars opercularis (rIFG group) or the centroid of ipsilateral S1 (control group). This

227 volume labeling and mask creation procedure was used for guiding TFUS target  
228 identification.

### 229 **TFUS targeting, setup and parameters**

230 All stimulation targets were planned prior to subject arrival. We used a Brainsight  
231 neuronavigation system (Rogue industries) with subjects' T1 scans to guide placement  
232 of the transducer beam profile with respect to each individual's neuroanatomy. First, we  
233 created a subject-specific mask from the cortical atlas registration and projected it into  
234 the Montreal Neurologic Institute (MNI) coordinate system (Evans et al., 1994). When  
235 planning the TFUS target, we considered both MNI coordinates and individual anatomy.  
236 For example, neuroimaging studies (Boehler et al., 2010) and metanalysis (Chikazoe et  
237 al., 2009; Levy and Wagner, 2011) have shown specific activation of the pars  
238 opercularis (around  $x=48$ ,  $y=16$ ,  $x=18$ ) for contrasts of successful inhibition versus Go  
239 trials and successful versus failed inhibition trials. In the case of the RIFG group, we first  
240 identified these MNI coordinates. Notably, the pars opercularis is an anatomical  
241 definition and is often referred to as ventro-lateral prefrontal cortex in neuroimaging  
242 studies focused on localization of activity that is functionally related to response  
243 inhibition and cognitive control (Levy and Wagner, 2011). During target planning, we  
244 confirmed the identified MNI coordinates were inside the anatomical region of the pars  
245 opercularis, identified from registering atlas maps to individual anatomy. We also  
246 performed visually confirmation that the TFUS target was indeed rostral to the inferior  
247 precentral sulcus, dorsal to the sylvian fissure, caudal to the ascending rhomulus of the  
248 sylvian fissure, and ventral to the inferior frontal sulcus (Tomaiuolo et al., 1999).  
249 Because significant anatomical variation exists in this region, individual anatomy rather

250 than coordinates were prioritized when planning the TFUS focus. For the S1 group,  
251 stimulation was targeted near  $x=-43$ ,  $y=-29$ ,  $z=54$  and within the left post-central gyrus.  
252 Because we used a single element transducer, with a fixed focal depth of 30mm and a  
253 5mm silicon spacer, all stimulation was done at a penetration depth of 25mm and  
254 normal the surface of the scalp.

255         After EEG setup, we used an infrared optical tracking system (Polars Vicra, NDI  
256 Medical) to register the subjects' structural MRI scans in virtual space, with their head  
257 and the ultrasound transducer in real space. The alignment and cortical registration  
258 were accomplished by registering the individual's T1 derived anatomy using the nasion,  
259 tip of the nose, philtrum, and left and right periauricular notch and tragus. To visualize  
260 the TFUS target in the cortex, we created a custom design in Solidworks that rendered  
261 the transducer housing and ellipsoidal beam profile projection into the registered cortex  
262 (Fig. 1C). A 3D printed housing was made for the transducer to hold the optical tracking  
263 unit and silicon spacer (ss-6060 Silicon Solutions, Cuyahoga Falls, OH  
264 <http://siliconesolutions.com/ss-6060.html>). Acoustic conductive gel was applied to both  
265 the transducer and the scalp. After correct placement of the transducer using the  
266 neuronavigation, we recorded the coordinates of the stimulation target. Figure 1C  
267 shows the rendering from one subject's T1 and scalp in the rIFG group, along with the  
268 3D rendering of the transducer housing (green object) and the pars opercularis mask  
269 (white anatomical structure). In the auditory rIFG control group, we employed a sham  
270 TFUS (similar to Legon et al., 2018) by placing the gel coated transducer perpendicular  
271 to the rIFG target. This sham procedure was done to ensure there was still an auditory  
272 effect of the ultrasound (from the pulse repetition frequency) without active stimulation.

273 The TFUS transducer was held flush to the head with a custom-made,  
274 lightweight, elastic mesh cap, which did not interfere with EEG recording. To ensure  
275 accurate TFUS placement throughout the experimental session, the rotational and  
276 cartesian displacement of the beam profile from the cortical target was tracked. The  
277 overall accuracy was measured as deviation from the original alignment of the beam  
278 with the anatomical target. During the experimental session, we sampled the position of  
279 the TFUS transducer during each break. Accuracy was very high, with an average  
280 deviation of  $\pm 1.5$  mm displacement across all subjects and sessions.

281 The setup and parameters used for TFUS in this experiment were nearly  
282 identical to those used by Legon et al. (2014). We used a broadband, single-element  
283 focused ultrasound transducer with a center frequency of 0.5 MHz, a fixed focal depth of  
284 30mm, and a lateral spatial resolution of  $4.5 \text{ mm}^2$  and axial spatial resolution of  $18 \text{ mm}^2$   
285 (Blatek, Inc., State College, PA) (Legon et al., 2014). Prior water tank testing through  
286 cadaver skull revealed transcranial spatial-peak pulse average intensity ( $I_{\text{sppa}}$ ) of  $5.8$   
287  $\text{W}/\text{cm}^2$ , and the optimal frequencies for TFUS transmission while minimizing cranial  
288 attenuation are 0.2- 0.65 MHz (Hayner and Hynynen, 2001; White et al., 2006).

289 The TFUS waveforms were generated using a two-channel, 2 MHz function  
290 generator (BK Precision) (Legon et al, 2014). Channel 1 was triggered by the  
291 presentation computer and produced the pulse repetition frequency (PRF) of 1.0 kHz.  
292 This was used to trigger channel 2, which produced short burst at the 0.5 MHz acoustic  
293 frequency. The result produced a ultrasound waveform with a carrier frequency of 0.5  
294 Mhz, PRF of 1.0Khz, and duty cycle 24%. Each stimulation duration was 0.5 s. The  
295 transducer power was driven by sending channel 2's output to a 40-W linear RF

296 amplifier (E&I 240L; Electronics and Innovation). The waveforms were triggered in  
297 alignment with experimentally-relevant temporal events (see description below and Fig.  
298 1A). It has been previously verified that the resulting waveform does not incur any  
299 heating of skin or skull bone (Legon et al., 2014).

### 300 **Computational simulation of TFUS propagation**

301 We quantified peak pressure amplitude, peak intensity and accuracy of the beam  
302 distribution with TFUS target to rIFG using the pseudospectral simulation method in K-  
303 wave (Treeby and Cox, 2010). Reference peak pressure planes for the simulations  
304 were derived from a water tank test and previous data (Legon et al., 2014). Simulation  
305 parameters were first validated by simulating the transducer in water to compare the  
306 simulation results with those from the water tank test. The max pressure plane at the  
307 30-mm focus in the water tank was used as a source input pressure for the transducer  
308 during the simulation. The transducer was modeled to have a 30-mm radius of  
309 curvature. Water simulations used a homogenously medium of water density (1000  
310 kg/m<sup>3</sup>) and speed of sound (1482 m/s). We created a computational grid over a 256 x  
311 256 x 256 with 1-mm spacing. The points per wavelength were 6, Courant–Friedrichs–  
312 Lewy = 0.1, and simulation time was set to 6 pulses (duration = 250 μs) to ensure  
313 simulation stability.

314 Simulation of ultrasound through water predicted a max pressure of 1.05 Mpa  
315 and spatial peak pulse average intensity (I<sub>sppa</sub>) of 22.4 W/cm<sup>2</sup> at the focus. This  
316 prediction closely aligns with previous studies and simulations (Legon et al., 2014) of  
317 the same transducer. Comparison of simulations and water data indicated a 97% match  
318 of pressure/intensity at the focus taken over a 5 mm<sup>3</sup> voxel section in all 3 planes at the

319 focus. The lateral full-width at half maximum of the max pressure at the beam was 4.39  
320 mm in simulation (Fig. 1C).

321 For simulating transcranial US, we extracted 3-dimensional maps of the skull  
322 from a CT (1-mm resolution) and brain from T1 MRI scan (1-mm resolution) from three  
323 preoperative patients at Barrow Neurological institute. The MRI and CT were both co-  
324 registered and normalized to the MNI space in SPM12. To mimic our approach of  
325 targeting used in the experiments, we surface registered the gray matter volume to the  
326 BCI-DNI atlas and identified the centroid of pars opercularis. This allowed us to map  
327 from world coordinates of the scan to MNI coordinates of the target (Fig. 1D). The  
328 average stimulation location for these three subjects was  $x = 48$ ,  $y = 18$ , and  $z = 6$ .  
329 Conversion from Hounsfield units in the CT to sound speed and density were done  
330 using the relations described in Aubry et al. (2003). All skull materials were set using  
331 these parameters, while other tissues were treated as homogeneous with parameters  
332 set to that of water. Attenuation was modeled as a power law with a  $\beta = 0.5$  and  
333 absorption was also modeled with a  $b = 1.08$  (Treeby and Cox, 2010). Results for this  
334 simulation are presented in the Results section.

## 335 **Data processing and experimental variables**

### 336 **Behavioral variables**

337 The main variables under consideration were the Go trial reaction time (Go RT),  
338 percentage of successfully inhibited responses on Stop trials (successful stopping) per  
339 SSD, failed inhibition reaction time, and SSRT. The SSRT was estimated using a  
340 hierarchical Bayesian parametric approach (Matzke et al., 2013a) that allows estimation  
341 of the distribution of SSRTs while assuming an ex-gaussian distribution of SSRTs.

342 Importantly, we chose this approach as Matzke et al. (2013a) showed that it performs  
343 well even when there are only a few trials available per SSD level. This SSRT  
344 estimation procedure was run separately per group (rIFG and S1) and trial types (No-  
345 TFUS Stop trials, Go-TFUS Stop trials, and Stop- TFUS Stop trials). As we report in the  
346 Results section, we used combined RTs from Go trials with and without TFUS because  
347 stimulation did not alter the Go RT.

#### 348 **EEG artifact removal**

349 Continuous EEG data were first down-sampled to 250 Hz, then high-pass filtered  
350 (1 Hz) and re-referenced to the scalp average. Any channels that displayed artifacts for  
351 more than 25% of the total session were removed before further processing but were  
352 later interpolated after artifact rejection. We removed channels that were designated  
353 unsuitable for analysis by visual inspection and absolute temporal standard deviation (>  
354 5) across channels. It is important to note that, in each of the stimulation groups, the  
355 cortical sites of rIFG and S1 were close to the F8 and CP4 electrodes. Therefore, these  
356 electrodes could not be used for EEG recording in their respective groups and were  
357 always interpolated after artifact removal. The remaining data processing involved  
358 creating epochs from Stop trials locked to stop signal onset (-100 to 500 ms  
359 peristimulus) because our analysis focused on this epoch. Individual epochs were then  
360 rejected from further analysis if they contained large scalp EMG or rare events (< 8% of  
361 all trials). The ERPs baseline corrected by subtracting the activity from -100 ms to the  
362 stop signal. Out of the 53 participants, 3 subjects were excluded from analyses due to  
363 EEG recording issues (impedance >25 k $\Omega$  across channels). The remaining data were  
364 bandpass filtered from 1-25 Hz. EOG artifacts related to eye movements and blinks



365 were removed using Independent Components Analysis using eeglab (ICA; Delorme  
366 and Makeig, 2004). On average, 3.35 components were removed per participant.  
367 Because we later applied a Hanning taper to the edges of the event-related potentials  
368 (ERP) before dynamic causal modeling, we applied the same procedure to the ERPs  
369 after cleaning using a Hanning taper.

## 370 **QUANTIFICATION AND STATISTICAL ANALYSIS**

### 371 **Behavior analysis**

372 To quantify how the probability of response inhibition changed over levels of  
373 SSD,  $P(\text{respond}|\text{signal})$ , and across TFUS conditions within and across groups we fit a  
374 2-parameter logistic model. This was done to analyze  $P(\text{respond}|\text{signal})$  as a curve.  
375 This was achieved using by fitting the 2-parameter linear mixed-effects model with  
376 random intercepts and slopes to obtain subject and condition specific model  
377 parameters.  $P(\text{respond}|\text{signal})$ , denoted as  $p$ , were converted to a negative logit ( $\log((1-$   
378  $p)/p)$ ) before fitting. As our main goal was to estimate the logistic curve slope ( $\beta$ ), we ran  
379 the mixed-effects model (using LME4 in R) with the full interaction of SSD and  
380 stimulation condition (no-TFUS, Go-TFUS, Stop-TFUS). Logistic slopes per subject  
381 were estimated by combining fixed and random coefficients.  $\beta$  parameters were  
382 analyzed using a mixed-design ANOVA on  $\beta$  with factors of Group (3 levels) and TFUS  
383 (3 levels: No, Go, Stop).

### 384 **Separating neural components of Go-responses and response-inhibition**

385 Our analysis of ERPs was based on the premises of the Independent Horse  
386 Race model (Logan and Cowan, 1984) – which posits independent accumulation of Go  
387 and Stop activity till one of them reaches threshold. Due to the nature of measuring

388 these processes through EEG and the inhibitory processes, there is overlap of neural  
389 processes related to stopping and going during stop trials. Therefore, we removed Go-  
390 related activity from both successfully (SS) and unsuccessfully (US) inhibited Stop trials  
391 through subtracting the Go ERPs from the Stop ERPs. We used the approach  
392 employed by Mattia et al. (2012). On a per-subject basis, we found Go-trial ERPs (No-  
393 TFUS and TFUS) that had RTs that were latency-matched to SS trials based on each  
394 subject's SSRT. These Go trials had to have RTs either equal to or greater than the  
395 SSRT. For US trials, we found latency-matched Go trials with RTs with a different  
396 procedure. We first calculated each subject's mean signal-respond RT for each of the  
397 two highest SSDs. We then calculated the difference in SSD (ms) and searched for Go  
398 RT trials for each SSD that fell within the mean signal-respond RT  $\pm$  half the difference  
399 of the SSD (ms). This was done to prevent overlap of activity from both faster and  
400 slower Go RTs and signal-respond RTs. These steps were performed separately for the  
401 highest and second highest SSD. This procedure was done separately for SS and US  
402 trials for both TFUS conditions. After correcting the SS and US stop trial, the corrected  
403 ERPs were averaged across the two highest SSDs per subject (corresponding to the  
404 85% and 105% mean Go RT of each subject). These ERPs were used for the remaining  
405 analysis.

#### 406 **Analysis of inhibition-related ERP**

407 Our analysis focused on event-related potentials (ERPs) from source-localized  
408 analysis and Dynamic Causal Modeling (DCM; David et al., 2006). The primary  
409 motivation for these analyses is that previous work has revealed a set of ERPs that  
410 often accompany response inhibition following a Stop signal (reviewed in Huster et al.,

411 2013 and Kenemans, 2015). The main ERPs found in inhibitory tasks include a N2/P3  
412 complex that has a fronto-central and radial topography. This component has been  
413 hypothesized to be generated mainly by the pre-SMA/SMA in the medial frontal cortex  
414 (Huster et al., 2013) and has been considered to reflect a critical signature of reactive  
415 stopping elicited by stop signal tasks (Kenemans, 2015; Wessel and Aron, 2017).  
416 Furthermore, the P300 of this complex has been proposed to be a relevant marker of  
417 stopping efficiency, given that it predicts the SSRT (Wessel and Aron, 2015) and  
418 successful versus failed inhibition (Kok et al., 2003). The ERP associated with stopping  
419 in rIFG is typically associated with a negative amplitude difference comparing  
420 successful and failed stopping that emerges around 200 ms (N200; Schmajuk et al.,  
421 2006). We examined these ERPs and P/N100 responses which are sometimes elicited  
422 over sensory areas, depending on whether the stimuli used for Go and Stop signals are  
423 in the same sensory modality (Kenemans, 2015). By combining TFUS and EEG, we can  
424 examine some of the issues that are addressed by ongoing debate, i.e., which of these  
425 potentials are stopping-relevant, and how their activity is generated by a network model  
426 through DCM – all without signal interference induced by stimulation.

#### 427 **Scalp space analysis.**

428 To examine the standard ERP effects typically found in the SST, we first  
429 examined activity at the sensor level. This was done using permutation-based  
430 dependent samples t-tests. Spatiotemporal activity was examined and multiple-  
431 comparison corrected for using a cluster-based p-value correction of  $p < 0.01$  and 5000  
432 permutations for each contrast considered. The contrasts included comparison of (1)  
433 successful stop (SS) – unsuccessful stop (US) trials over Go-TFUS and Stop-TFUS

434 conditions, a (2) SS (No-TFUS) – SS (Stop-TFUS) contrast, and (3) and interaction  
435 contrast comparing SS – US difference between the No-TFUS and Stop-TFUS  
436 conditions. The first contrast is typically used to determine which areas exhibit ERPs (or  
437 brain areas) that differentiate successful inhibition (Swaan et al., 2012). The third  
438 contrast (interaction) was used to determine how the SS-US contrast differed between  
439 No-TFUS and Stop-TFUS conditions. The second contrast was the main focus of our  
440 analysis and was used to determine which scalp ERPs differentiated successful  
441 stopping in the No-TFUS and Stop-TFUS conditions. We anticipated that this contrast  
442 would reflect processes that mainly include those responsible for both the success and  
443 efficiency of inhibitory processes, e.g., SSRT.

#### 444 **P300 onset and SSRT TFUS effects**

445       Recent work has indicated that the frontocentral P300 onset latency is related to  
446 the SSRT (Wessel and Aron, 2015). Therefore, we hypothesized that TFUS altered  
447 inhibition through the SSRT and expected a shift in this latency as well. We calculated  
448 the shift in P300 onset crossings between TFUS conditions in two steps. First, we took  
449 the across-subject mean frontocentral ERP waveform in a time-window of  $\pm 50$  ms  
450 around the zero-crossing. To calculate each subject's zero-crossing time, we calculated  
451 the dynamic time warping distance from the template mean ERP to the subject's ERP.  
452 Second, this distance was added to the median zero-crossing time to obtain an  
453 individual subject crossing for both the No-TFUS- and Stop TFUS-locked conditions.

#### 454 **Source localization**

455 To estimate the activity in source space from the sensor recordings, we used a  
456 group inversion with the multiple sparse-priors approach as implemented in SPM12.  
457 The individual subject data passed to the inversion routine were mean sensor ERPs per  
458 condition. We performed the group inversion only for the rIFG groups and analysis  
459 because this was the only group to exhibit behavioral effects from TFUS. In this  
460 procedure, the individual's recorded electrode locations and individual T1 were warped  
461 to the default MNI anatomical brain and cortical mesh provided in SPM. These meshes  
462 were used to calculate the forward solution using a boundary element head model. All  
463 conditions were used in the group inversion routine. Because the multiple sparse-priors  
464 approach attempts to fit the sensor data with respect to the lead-field matrix, we  
465 performed the inversion over a window starting from the stop signal up to 500 ms. While  
466 narrow windows are considered better for time-resolved estimation, we wanted to  
467 estimate overall changes in activity using the same window we would employ later for  
468 dynamic causal modeling.

#### 469 **Source analysis: Whole-brain contrasts and regression**

470 Based on examination of the sensor level data, we first identified time windows  
471 surrounding the ERPs discussed above (N100, N200, and P300). To balance the  
472 number of points contributing to the source estimate used for analysis, we used the  
473 same window size for estimating the source activity of each ERP. The time windows  
474 were centered around the across-subject mean peak activity of each ERP with a  
475 window of  $\pm 40$  ms. These time windows were used to create 3D source image activity  
476 interpolated into MNI voxel space for each subject and condition. The resulting images  
477 were spatially smoothed (6 mm full-width half maximum) evoked power from 1-25 Hz.

478 We used evoked power because we were concerned with ‘activation’ and time window,  
479 but not the direction of voltage deflection. This choice was driven by the fact that we  
480 already established the canonical inhibition related ERPs at the scalp level. These  
481 evoked images were analyzed used a flexible factorial design to implement a repeated-  
482 measures ANOVA, including all main effects and interactions. The factors included (1)  
483 inhibition success (SS or US trial), and (2) stimulation condition (No-TFUS or Stop  
484 TFUS). The resulting statistical parametric maps were analyzed with a threshold set at  $p$   
485  $< 0.005$  (peak-level, uncorrected) and cluster-wise FWE  $p < 0.05$ . For expositional  
486 brevity, these SPMs are presented in the supplementary material except for the  
487 conjunction F-contrast showing the overlap of the SS-US and TFUS F-contrasts. This  
488 conjunction shown in the main text both confirms the differential SS-US effect in rIFG  
489 and the spatially precise impact of TFUS.

490 We also conducted a whole-brain SPM linear regression using the same time  
491 windows identified above. We regressed the difference in evoked activity between No-  
492 TFUS and Stop-TFUS SS trials against the difference in each subject’s SSRT for these  
493 conditions. Using this approach, we examined both positive and negative contrasts (t-  
494 tests) in each window. This analysis was done to (1) determine prior source locations  
495 for the DCM analysis (see below) and (2) identify which areas predicted the change in  
496 SSRT due to TFUS. Because a primary goal was determining DCM priors, we used a  
497 lenient uncorrected cluster threshold of  $P < 0.01$  and a minimum cluster-extant  
498 threshold of 20 voxels.

#### 499 **Dynamic Causal Modeling (DCM)**

500 To model the connectivity of the network involved in successful stopping, we  
501 used the canonical microcircuit model (Bastos et al., 2012) for all areas except the  
502 contralateral motor cortex. For left motor cortex (M1), we used a recently developed  
503 version built-off the canonical microcircuit that more closely resembles the agranular  
504 structure of M1 (Bhatt et al., 2016). Our sequential model building and analysis focused  
505 both on a priori areas of interest that have been well described in response inhibition  
506 literature (e.g., Wessel and Aron, 2017) – including rIFG, rpre-SMA, rDLPFC – and  
507 those areas that we identified in comparing the effects of Stop TFUS and No-TFUS  
508 changes in SSRT on evoked power. Given the typically right-lateralized areas found to  
509 be modulated by inhibition, we focused mainly on pathways on the right hemisphere.  
510 We used source locations identified in both (1) the regression of change in SSRT and  
511 (2) the whole-brain SPM interaction F-contrasts examining locations for which Stop-  
512 TFUS and No-TFUS were different for the SS-US comparison. The significant source  
513 cluster peaks ( $P < 0.01$  threshold) revealed by these analysis were labeled using the  
514 AAL atlas labeling toolbox, and used to identify source coordinates in MNI space  
515 ( $[x,y,x]$ : rIFG [48,28,4]; pre-SMA [6, 24, 54]; rDLPFC [30, 28, 40]; rParietal [10,-74,56];  
516 rTemporal [52,-18,-12]; LM1 [-37,-25,-62]; right inferior occipital gyrus (rIOG) [46, -  
517 76,10]). These source locations are in general agreement with previous literature in both  
518 fMRI, EEG, and MEG studies of SSTs (Aron et al., 2006; Boehler et al., 2010; Rae et  
519 al., 2014) and meta-analyses of cortical locations and boundaries (Chikazoe et al.,  
520 2009). In building the model, we also included a hidden deep source to model the  
521 potential connectivity effects to and from cortical sources. Because the main output of  
522 the basal ganglia mediating inhibition and responding is the thalamus, we used a source

523 location [4, -16, -2] identified during a previous fMRI stop signal study (Boehler et al.,  
524 2010). This approach of using a deep source node in DCM for EEG has been previously  
525 employed by David et al. (2011). In the DCM, we used an equivalent current dipole  
526 model and allowed the inversion process to optimize the source locations.

527 To determine the appropriate model connectivity structure, we first examined the  
528 grand mean ERP data in SS No-TFUS trials from a window spanning 0 – 500 ms.  
529 Recent work has shown that estimating the model structure from grand means (across  
530 subjects) is sufficient and provides a close approximation to fixed-effects selection when  
531 using ERP data (Litvak et al., 2015) rather than fitting DCMs across all subjects for each  
532 variation in connection structures.

533 To optimize the model structure, we performed Bayesian model selection using  
534 family-wise fixed effects in several iterations. In the first set of iterations, we inverted 48  
535 different models from the grand mean data, and then partitioned it into several families  
536 (Penny et al., 2010). These families were based on (1) the structure of the pre-frontal  
537 hierarchy (Fig. S1), (2) structure of the lower hierarchy (Fig. S1), (3) whether exogenous  
538 inputs were supplied to right inferior occipital gyrus (rIOG), rIFG, or both, and (4)  
539 whether the cortical nodes projecting to the hidden deep source were of the forward or  
540 backward type. Inputs were modeled as a Gaussian bump with a prior onset of 60 ms.  
541 With respect to comparison (4), pulling evidence from previous inhibitory control,  
542 primate tracing, and tractography studies and reviews, the areas we examined for  
543 different connections projecting to the deep node included rIFG, pre-SMA, right  
544 dorsolateral prefrontal cortex (rDLPFC) and rIOG. A backward connection from M1 to  
545 the deep node was also included based on putative M1 to basal ganglia connections



546 (Nambu et al., 2002). Because the efferent connections from Thalamus output is  
547 excitatory and has been found to target deep pyramidal layers (Yamawaki et al., 2014),  
548 the above listed areas all received forward connections from the deep source.

549 In this modeling, we assumed hierarchically connected areas always entailed a  
550 backward and forward connection between nodes. Nodes that were lateral in a  
551 hierarchy were supplied with both forward and backward nodes (Fig. S1). A final note is  
552 on the connections between lower areas and prefrontal areas. Rather than optimize all  
553 possible connection permutations, we chose to instantiate connections that reflect the  
554 cognitive and attentional control-related differences typically postulated to operate in  
555 dorsal and ventral pathways (Corbetta and Shulman, 2001). Both streams received  
556 forward input from rLOG. The ventral stream included a forward connection from  
557 rTemporal cortex to rIFG. The dorsal stream included forward projections from rParietal  
558 to both rDLPFC and pre-SMA.

559 After inversion of each model, we used a fixed-effects Bayesian model selection  
560 to perform family inference and calculate the model posterior probability to determine  
561 the winning model in each family. The family model probability results from these four  
562 different family comparisons are shown in Figure S2. This analysis indicated that,  
563 across families, the winning model had (1) a prefrontal hierarchy with laterally  
564 connected rDLPFC and rIFG above pre-SMA, (2) a parallel structure of rParietal and  
565 rTemporal cortices without a lateral connection, (3) exogenous inputs to both rLOG and  
566 rIFG, and (4) backward cortical to deep connections. A diagram of the final model  
567 structure is shown in the DCM results section.

568           The next step in model building involved determining which connections were  
569 modulated by conditions specific changes between No-TFUS SS and US trials and,  
570 primarily, between No-TFUS SS and Stop-TFUS SS trials. For our purposes, this  
571 included extrinsic connections between areas and intrinsic gain connections within an  
572 area. Instead of testing an expansive set of permutations of condition-specific  
573 modulations of extrinsic connections (B matrix in DCM), we a priori opted to use the  
574 recently developed Parametric Empirical Bayesian modeling framework for DCM  
575 (Friston et al., 2016). As will be explained below, this involves doing Bayesian statistics  
576 on full DCMs that will have all condition modulatory parameters of interest entered a  
577 hierarchal-general linear model from which hypotheses can be tested. This obviates the  
578 need for conventional statistics and model reduction over all extrinsic connections. If a  
579 DCM model is referred to as full, this includes condition-driven modulations of all  
580 extrinsic connections. Otherwise it includes an explicitly stated set of connections.

581           After determining a model structure, we inverted this model for each subject's  
582 ERPs. This inversion was performed twice, using different combinations of trials to  
583 assess different hypotheses. The DCM was first inverted using the No-TFUS US and  
584 SS trial ERPs. The US trial was set as the baseline. This inversion allowed us to first  
585 compare how the network connections were modulated between US and SS trials in a  
586 baseline network without the effects of TFUS. Specifically, we wanted to examine how  
587 changes in connectivity (DCM B matrix) distinguished between unsuccessful and  
588 successful inhibition. Analysis of this general linear model (described below) focused on  
589 the B matrix which describes how connections changed between conditions. This  
590 comparison was done to mirror the standard comparison of SS and US trials that is

591 typically employed to reveal what inhibitory mechanisms were more potently activated  
592 during SS trials (Aron et al, 2014). Furthermore, using this contrast of conditions  
593 provides a baseline to ask whether the same connectivity mechanisms were altered  
594 when comparing No-TFUS and Stop-TFUS SS trials. Therefore, the second DCM model  
595 inversion was applied to the No-TFUS and Stop-TFUS SS trials. The No-TFUS trials  
596 were used as a baseline for the fit. Again, this allowed a focus on the connectivity  
597 modulation between the two conditions and treated the non-stimulation condition as the  
598 baseline network.

599 To analyze the resultant DCM condition-specific changes and the modulation of  
600 connectivity parameters by experiment relevant variables (e.g., SSRT), we tested  
601 group-level effects using the Parametric Empirical Bayes (PEB) framework. We give a  
602 brief overview of PEB (for in-depth discussion, see Friston et al., 2016) for hypothesis  
603 testing and connectivity parameter extraction using a PEB. Building a PEB statistical  
604 model involves creating a hierarchical model with, in our case, two levels. The lower  
605 level is the subject level, which is the results of DCM fits to individual's ERP data. This  
606 first level includes the posterior means and uncertainties for each subject's DCM  
607 connectivity parameters. The PEB framework statistically models these parameters  
608 using a Bayesian general linear model (GLM) at the group level. As is the case with  
609 GLMs (and mixed models), the model attempts to explain the connectivity parameters  
610 as between-subject and within-subject variability, while allowing for between-subject  
611 differences in connectivity parameters to be treated as random effects. The PEB  
612 Bayesian GLM allows using subject-based DCM parameters to be examined using a  
613 linear model with respect to explanatory variables at the between-subject (group) level.

614 Because the PEB framework yields group-level estimates as empirical priors, this  
615 approach also allows changing parameters that were estimated at the subject level by  
616 allowing them to be estimates distributed around a group mean effect. This process  
617 stands in contrast to the typically used “summary statistic” approach, which often  
618 involves applying several t-tests or correlations per connection.

619 For clarity, we built two separate PEB models for the DCMs fit to (1) No-TFUS  
620 US and SS trials, and (2) No-TFUS and Stop-TFUS SS trials. The former PEB model  
621 was used to test hypotheses regarding mean changes in connectivity between  
622 unsuccessful and successful inhibition at baseline (No-TFUS). The latter PEB model  
623 was used to address (1) how the inhibition network connectivity changed on average  
624 between TFUS conditions (intercept in GLM), and (2) how individual differences in the  
625 change in SSRT between TFUS conditions was embedded in changes in connectivity  
626 parameters across subjects (covariate). Therefore, in the first model we only used the  
627 mean intercept as the explanatory variable to examine mean changes in connectivity  
628 between No-TFUS US and SS trials. The mean change parameters represent the gain  
629 change in connectivity going from US to SS trials. In the second model, which examined  
630 No-TFUS SS and Stop-TFUS SS trials, we used a design matrix of explanatory  
631 variables that included an (1) intercept representing mean changes in connectivity  
632 (mean TFUS effect), (2) the change in individual subject’s SSRT between TFUS  
633 conditions, and (3) the TFUS change in individual subject SSRT variability. Before  
634 entering the SSRT covariates, they were transformed to a gain change by taking the  
635 log-ratio of Stop-TFUS SSRT (mean or variability) over the No-TFUS SSRT (mean or

636 variability). The covariates were then z-scored to have a zero mean and yield  
637 standardized PEB model parameters.

638         When initially estimating each of the two PEBs, we always entered in the full  
639 model including all extrinsic and intrinsic connection modulatory parameters. Because  
640 our hypotheses centered around changes along prefrontal and deep areas, and ventral  
641 pathway interactions, we first compared the PEB model with and without dorsal pathway  
642 connection parameters. We show in the results that, across both PEBs, the model  
643 without dorsal pathway connection changes yielded a better model with respect to the  
644 explanatory variables. This allowed a substantial reduction in connectivity parameters  
645 needing to be tested.

646         Once the group-level GLM parameters were estimated with respect to  
647 modulations of extrinsic and intrinsic connectivity, we used this framework to test  
648 several hypotheses regarding mean and SSRT driven changes in connectivity  
649 parameters. Hypothesis testing proceeds by Bayesian model reduction of the GLM. This  
650 involves turning off/on different connectivity parameters and comparing the free energy  
651 of reduced models. Comparing models in this manner is similar to performing classical  
652 hypothesis testing via model reduction in mixed models by employing likelihood ratio or  
653 F-tests.

654         Hypotheses were tested by designing models with different combinations of  
655 parameters on/off. The model space of these hypotheses was defined in a factorial  
656 space that focused on 4 factors that could be modulated by mean connectivity changes  
657 (PEBs 1 and 2) or connectivity modulation via TFUS induced changes in SSRT (PEB 2).  
658 These factor/hypothesis spaces were driven by previous work. The first set of models

659 considered how inhibition is related to pathways the backward connections from rIFG  
660 and pre-SMA to the deep (i.e., basal ganglia) nodes. The second factor, driven by work  
661 indicating that pre-SMA interacts with rIFG before deep projections (Rae et al., 2009),  
662 tested for modulation of their backwards and forwards connections. The third factor was  
663 motivated by proposals that differences in inhibition (SS vs. US) might be mediated  
664 changes in attentional orienting, which predict changes in intrinsic self-inhibitory gain in  
665 either rIFG, rIOG, or both. Therefore, this factor examined for modulation of the  
666 superficial pyramidal cell gain across the nodes. Finally, to examine how SS versus US  
667 and different TFUS effects on inhibition depend on top-down vs bottom-up processing,  
668 our final comparison tested for the inclusion of either backward, forward or both sets of  
669 connections along the ventral pathway. Given that each of 4 factors had 3 levels each,  
670 plus a null (all zero) model, the first PEB surmounted to testing  $3^4+1$  (82) models, and  
671 PEB model 2 included  $2*3^4+1$  (163) models.

672         Rather than summarize these effects as the free energy for each model, which  
673 would surmount to a severe reduction in discerning the probability of a winning model,  
674 the hypotheses were grouped into families, and model hypotheses were tested at the  
675 family level. After using family model comparison on reduced GLMs, we used Bayesian  
676 model averaging (BMA) to obtain GLM model estimates of connectivity parameters  
677 having a posterior probability >95%. BMA was performed on all families within a factor,  
678 weighting the summarized parameters by the probability of the family. For example,  
679 BMA parameters for the second PEB mode that includes the mean SSRT as a  
680 predictor, for example, should be interpreted as would a linear regression coefficient;  
681 similarly, the mean term would represent the mean change in connectivity. These BMA

682 parameters were reported as the final changes in connectivity and should be considered  
683 to have a 95% probability of being non-zero.

684 Before conducting our main analysis presented, and to reduce the model space,  
685 we first considered whether the best PEB model would include ventral and dorsal  
686 pathway projections after fitting to individual subjects. Specifically, we asked if  
687 describing the baseline difference of no-TFUS SS and US inhibition involved modulation  
688 of either or both the dorsal and ventral pathways. Using the family-based hypothesis  
689 comparisons test described above for PEBs, we created factor spaces including the  
690 dorsal, ventral, or both pathways. Both sets of pathways included top-down and bottom-  
691 up connections that were grouped together. The dorsal pathway included the rParietal  
692 and rDLPFC nodes and the ventral pathway included rIFG and rTemporal. Bayesian  
693 model comparison (probability = 1) revealed strong evidence in favor of the model with  
694 just ventral pathway connection modulations from US to SS trials. Based on this result,  
695 we excluded dorsal pathway connections from the rest of our DCM analysis to reduce  
696 the space of parameters.

## 697 **Results**

698 Human participants performed a Stop-Signal task with online, trial-by-trial TFUS.  
699 Subjects were divided into groups based on receiving one of three stimulation type: (1)  
700 active stimulation targeted to right pars opercularis, (2) an active stimulation control site  
701 (ipsilateral somatosensory, S1) to account for non-site specific TFUS, and (3) sham  
702 stimulation to account for TFUS auditory artifacts. Since TFUS has been demonstrated  
703 to illicit immediate effects on ERPs (Lee et al., 2016), stimulation was applied online

704 (see Methods) either at the onset of the go or stop signal cue, during both Go and Stop  
 705 trials (Figure 1A). We hypothesized that if rIFG implemented motor inhibition, then  
 706 TFUS behavioral effects would be limited to alteration of stopping but not going. TFUS  
 707 in the pars opercularis group improved inhibition, while exerting no effects in control  
 708 groups. TFUS also altered inhibition related ERPs, which were quantified at electrode  
 709 and source-localized levels, while also assessing TFUS impact on effective network  
 710 connectivity assessed using DCM.

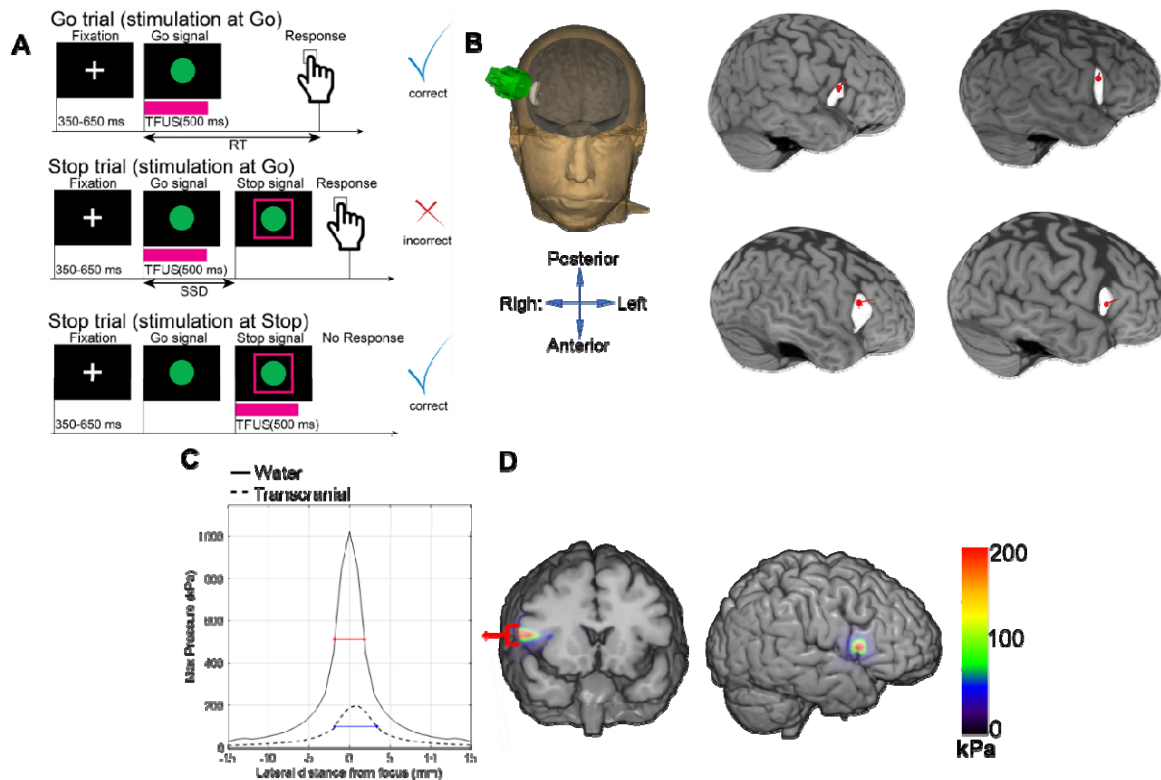

711

712 Figure 1 **A**. visual layout of Stop-Signal task and corresponding times when transcranial focused  
 713 ultrasound (*TFUS*) was delivered. **B**. The left plot shows the average neuronavigation location of *TFUS*  
 714 applied to all MRIs used in the rIFG group. The structural scans on the right show renderings of the  
 715 targeted *TFUS* point in pars opercularis in 4 subjects. **C**. Lateral maximum pressure profile obtained at  
 716 30-mm depth focus in both water and transcranial ultrasound simulation on a CT scan from one patient  
 717 (solid and dotted lines, respectively). Horizontal red and blue lines denote full-width half maximum of the  
 718 spatial profile of lateral pressure. **D**. Simulated transcranial pressure profile onto T1 MRI plot shown as a  
 719 color overlay.

720 **Numerical simulation of TFUS to rIFG**



721 To determine intensity and accuracy of TFUS after skull transmission in the rIFG  
722 group, we used numerical simulations based on CT and MRI data from 3 preoperative  
723 patients and validated the simulation results using a water tank test. At the focus,  
724 modeling of transcranial simulations predicted an average maximum intensity of 2.8  
725 W/cm<sup>2</sup>. This is in the range of intensity of non-thermal neuromodulation (Legon et al.,  
726 2014). Additionally, predicted shifts in peak pressure due to skull transmission was 1.25  
727 mm laterally, relative to a water model simulation, and had a lateral full-width half  
728 maximum of 5.1 mm (Fig. 1C). These simulations indicate a high spatial precision with  
729 >95% of energy limited to pars opercularis (Fig. 1D).

### 730 **Only TFUS to rIFG alters response inhibition**

731 We first addressed how probability of failing to inhibit responses,  
732 P(respond|signal) (Fig. 2A), changed across TFUS conditions within and across groups,  
733 by fitting a 2-parameter logistic linear mixed-model to obtain a slope ( $\beta$ ) of the response  
734 inhibition curve across all subjects and TFUS conditions. Modeling indicated a good fit  
735 of the logistic curve (mean  $R^2 = 84\%$ ). Analysis of  $\beta$  indicated only the rIFG group  
736 exhibited a TFUS-altered P(respond|signal). Importantly, behavioral effects of TFUS  
737 were not found for either control groups. Anova results indicated a significant Group x  
738 TFUS interaction ( $F(2,50) = 3.8, p = 0.034, \eta_p^2 = 0.17$ ), and an overall effect of TFUS  
739 condition ( $F(2,50) = 11.74, p = 0.002, \eta_p^2 = 0.29$ ). Follow-up one-way ANOVAs across  
740 TFUS onsets (e.g., coincident with stop signal), but within-groups, showed only the rIFG  
741 group exhibited differences across onsets. Follow-up t-tests in this group showed  $\beta$  for  
742 Stop-TFUS was lower than No-TFUS and Go-TFUS conditions (both  $p < 0.01$ : mean  $\beta$ 's  
743 indicating change in probability for approximately 25% change in normalized SSD: No-

744 TFUS = 0.35 (0.12), Stop-TFUS=0.27 (0.08), Go-TFUS=0.35 (0.11)). These results  
745 indicate only the rIFG group was affected by TFUS, as predicted, and only during Stop-  
746 TFUS.

747 Figure 2A shows improved inhibition performance during Stop-TFUS for the rIFG  
748 group occurred at longer SSDs (65% and 95% SSD). A repeated-measures ANOVA on  
749  $P(\text{respond}|\text{signal})$  for the rIFG group across all SSD levels and TFUS onsets revealed a  
750 significant interaction ( $F(6, 102) = 8.21, p < 0.0001, \eta^2 = 0.33$ ). Contrast t-tests between  
751 Stop-TFUS and the average of No- and Go-TFUS across all SSDs indicated the  
752 interaction resulted from a reduction in  $P(\text{respond}|\text{signal})$  for Stop-TFUS in the highest  
753 two SSDs (all  $p < 0.01$ ; Bonferroni  $\alpha = 0.0125$ ). These results indicate Stop-TFUS  
754 induced improvements of inhibition were more pronounced at later SSDs.

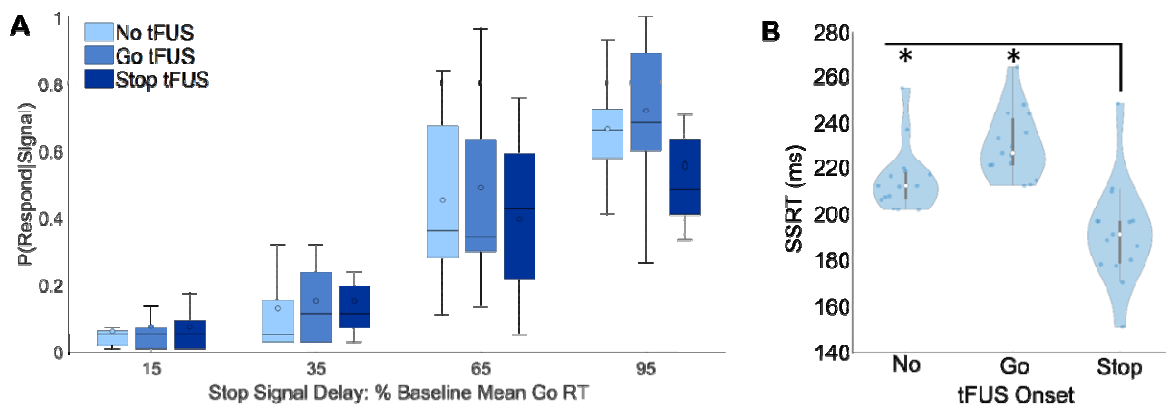

755

756 Figure 2. **A.** Probability of responding across stop signal delays in the rIFG TFUS group for all TFUS  
757 onsets. **B.** Violin plots of rIFG group across-subject distribution of stop signal reaction times (SSRT).

758

759 Based on the prediction that rIFG implements an inhibitory process and our  
760 finding that TFUS improved inhibition in this group, we hypothesized rIFG TFUS  
761 changes to  $P(\text{respond}|\text{signal})$  should result from a shortening of the stopping speed

762 (i.e., SSRT); notably, TFUS did not affect other behavioral variables (e.g., Go RTs, see  
763 Supplementary Material). SSRT analysis in a mixed-design ANOVA indicated a  
764 significant Group x TFUS interaction ( $F(4,100) = 10.2, p < 0.001, \eta_p^2 = 0.21$ ). Follow-up  
765 one-way ANOVAs within-groups indicated only rIFG group SSRTs (Fig. 2B) differed  
766 between TFUS onsets ( $p < 0.05$ ), with t-tests confirming that SSRTs were indeed  
767 shortest and only altered during Stop-TFUS (Fig. 2B). This result, along with the above  
768  $P(\text{respond}|\text{signal})$ , indicate rIFG Stop-TFUS altered inhibition by shortening the stop  
769 process (SSRT).

### 770 **Neural components underlying inhibition**

771 In the rest of the results we focus our analysis on the rIFG group because this  
772 was the only group exhibiting behavioral effects of TFUS. Furthermore, we only analyze  
773 No-TFUS and Stop-TFUS conditions because Go activity was subtracted from neural  
774 data at Stop trials (see Methods).

775 Our first analysis examined sensor-level ERPs across three contrasts using  
776 cluster-based permutation t-tests: (1) successful – unsuccessful stopping contrast over  
777 both TFUS conditions, (2) successful (No-TFUS) – successful stopping (Stop-TFUS)  
778 contrast, and (3) interaction comparing successful – unsuccessful stopping between the  
779 No-TFUS and Stop-TFUS conditions. The cluster-based scalp maps show the  
780 progression of clusters time-locked to the stop-signal onset (0 ms, Fig. 3A,B).

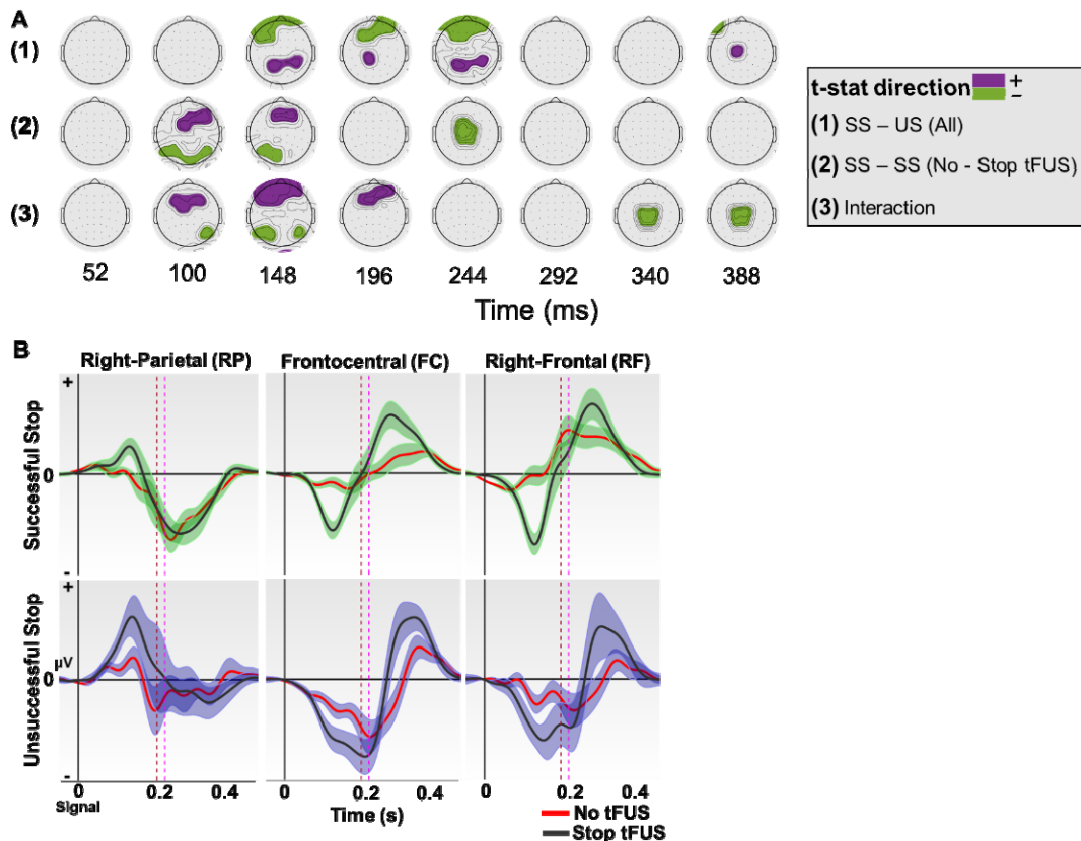

781

782 Figure 3. **A.** Scalp plots of cluster-corrected permutation paired t-tests ( $p < 0.01$ ). Colored contours  
 783 represent significant clusters. (1). Contrast of all SS and US trials. (2). Contrast of TFUS conditions SS.  
 784 (3). Interaction contrast calculated as SS-US of No-TFUS trials minus SS-US Stop-TFUS trials. **B.**  
 785 Average ERP time courses of three clusters identified by the permutation testing that were differentiated  
 786 by statistical contrasts. From left to right, the first cluster (left column) is right-parietal electrodes (CP6,  
 787 CP4, P6, P8), the second cluster (middle column) is fronto-central electrodes (C1, Cz, C2), and the third  
 788 cluster (right column) is right-frontal electrodes (F8, F6, F4). The vertical dashed lines represent the stop-  
 789 signal reaction times for the No-TFUS (magenta) and Stop-TFUS (maroon). Latencies in A and B are  
 790 expressed relative to stop signal onset (0 ms).

791

792 We identified several ERPs that differentiated successful stopping (SS) and  
 793 unsuccessful stopping (US) trials. The first contrast of SS-US (Figure 3A, row 1)  
 794 indicated SS trials exhibited a larger ERP centralized over a right-parietal cluster around  
 795 the time-range typically found for the P100 peak (100-148 ms). The interaction of SS-  
 796 US and TFUS showed this effect occurred earlier and during the peak onset (80-100  
 797 ms) of Stop-TFUS trials. Consideration of the SS-SS contrast (TFUS effect; Figure 3A-

798 2<sup>nd</sup> row) indicated the largest effect was attributable to the SS TFUS trials, supporting  
799 previous conjectures that inhibition and stopping speed is directly related to larger P100  
800 parietal responses. This result also aligns with previous studies reporting an enhanced  
801 P100 during successful stopping (Boehler et al., 2009).

802 We also examined the N100 in the right-frontal cluster in the 80-120 ms window  
803 (Figure 3B). We did not find a difference in the frontal N100 with respect to the overall  
804 SS – US contrast (Figure 3A). This result is in line with several other studies noting a  
805 non-significant effect of this contrast (Kenemans, 2015). However, we did find the ERP  
806 was substantially larger in SS TFUS trials compared to SS No-TFUS trials indicating a  
807 direct contribution to stopping efficacy. This increase for SS TFUS suggests this ERP  
808 may stem from rIFG and provide an index of stopping speed, rather than success.

809 The ERPs most commonly associated with response is the N200/P300 complex.  
810 Notably, the N200 often appears in both right-frontal and fronto-central clusters, while  
811 the P300 is more aligned with the fronto-central (Huster et al., 2013; Kenemans, 2015).  
812 When examining the N200, which typically only appears during US (Liotti et al., 2010;  
813 Wessel et al., 2015), we found an ERP peaking around 200 ms in both clusters that only  
814 appeared in US trials (Figure 3B). This N200 emerged during both No- and Stop-TFUS  
815 (Figure 3, bottom right), with a larger amplitude during US Stop-TFUS.

816 Of all possible ERPs, the fronto-central P300 has been regarded as the most  
817 robust marker of response inhibition and stopping speed (Wessel and Aron, 2015).  
818 Accordingly, we found P300 amplitude differed between SS and US trials, with US trials  
819 exhibiting a larger amplitude around the peak (290-320 ms) (Figs. 3A-B). However,  
820 because P300 peaks occur after the SSRT, this implies it is too temporally protracted to

821 reflect inhibition (Huster et al., 2013). Alternatively, others have indicated the P300  
822 onset latency is related to inhibition because it scales with individuals SSRTs (Wessel  
823 and Aron, 2015). Based on this notion, we considered whether the P300 onset was  
824 causally related to the SSRT shortening induced by TFUS. We tested the specific  
825 prediction that Stop-TFUS SS trials should exhibit an earlier onset that correlates with  
826 individual changes in SSRT. Visually, contrasting waveforms of SS trials across TFUS  
827 conditions (Fig. 3B, upper-middle) supports this intuition that P300 onset (zero-crossing  
828 in Figure 3B) shifted earlier in alignment with Stop-TFUS induced SSRT shifts. This was  
829 quantitatively supported by a significant, across-subject correlation between the TFUS  
830 induced in change P300 onset and SSRT ( $0.61, p < 0.05$ ), providing direct support that  
831 P300 latencies reflect the timing of inhibition speed.

### 832 **Whole-brain source SPM and source-based regression analysis**

833 We also examined source-based activity to localize TFUS-induced changes in  
834 evoked activity and generating source location priors for DCM. We hypothesized that, if  
835 differential rIFG activation indexed SS versus US, then conjunction analysis should  
836 reveal an overlap between SS – US and No-TFUS – Stop-TFUS conditions if rIFG  
837 activity is related to successful stopping (Aron et al., 2014). As expected, whole-brain  
838 SPMs (Fig. 4A) revealed the only area exhibiting an overlap was a pars opercularis-  
839 centered rIFG peak during the 20-100 ms time window (results of analysis of other time  
840 windows are reported in Supplementary Material).

841 To understand how TFUS altered stopping efficacy, we compared changes in  
842 SSRT between Stop-TFUS and No-TFUS SS trials using whole-brain SPM linear  
843 regression. In the regression, positive contrasts indicate  $\Delta$ SSRT (No-TFUS – TFUS) is

844 associated with larger activity in No-TFUS trials. Negative contrasts indicate TFUS SS  
845 trials exhibit larger evoked activity predicted by larger changes in SSRT. The negative  
846 contrast in Figure 4B indicates that the first site to exhibit increased TFUS-related  
847 predictions is rIFG. This occurred both in the -40:20 and 20:100 time-windows. The  
848 positive contrast found in early time windows indicates Stop-TFUS exerted effects on  
849 stopping by also decreasing early activity in both bilateral parietal and right temporal  
850 sites. We also found pre-SMA was only predictive of SSRT after rIFG, with the pre-SMA  
851 modulation peaking at 100:180 ms. These results show that areas typically associated  
852 with successful inhibition were predictive of TFUS-induced changes in behavior while  
853 occurring before the SSRT itself.

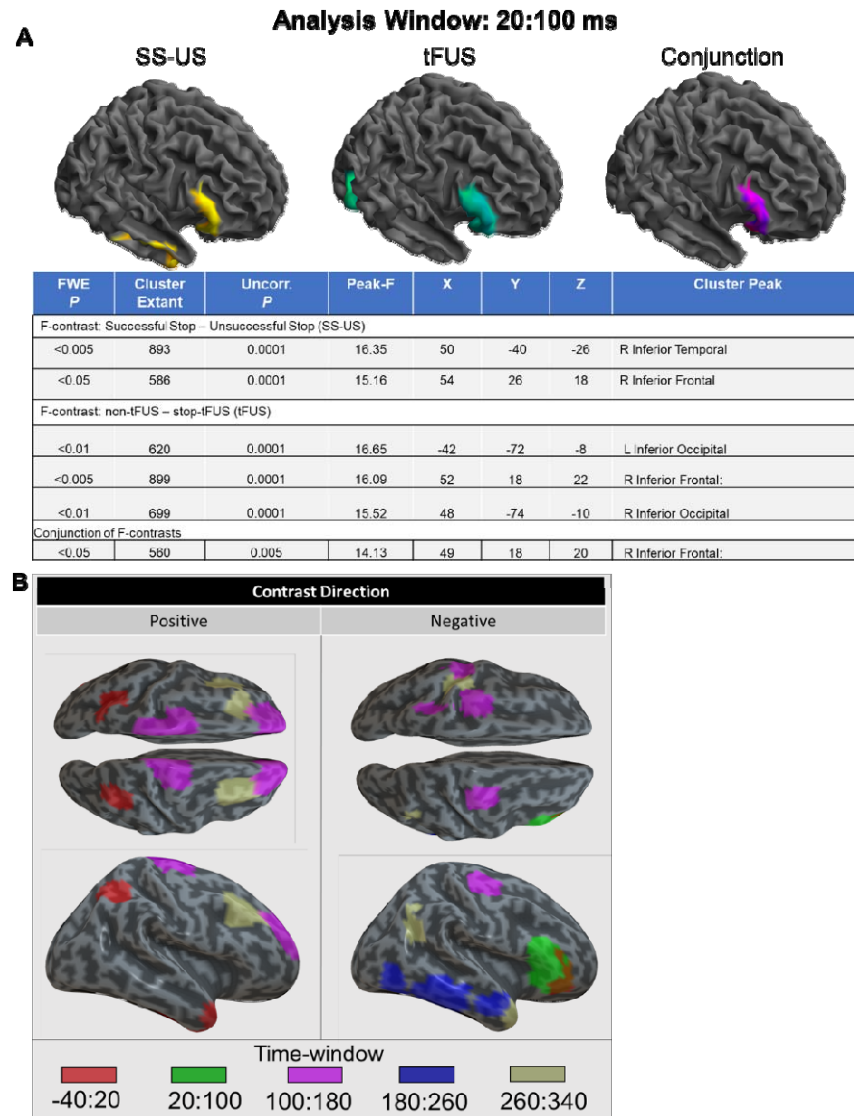

854

855 Figure 4. **A.** Whole-brain SPM F-contrasts of evoked activity in the 20:100 ms window. Figure shows the  
 856 surface mesh projections of the overall SS – US (left) TFUS contrast (middle), and conjunction (right).

857 Below the surface meshes is a table listing the statistics. **B.** Whole-brain SPM linear regression of activity  
 858 No-TFUS and Stop-TFUS SS trials against SSRT changes in No-TFUS and Stop-TFUS SS trials.

859

## 860 **TFUS effects in an inhibition network: Dynamic Causal Modeling (DCM)**

861 The above TFUS results provide evidence that rIFG activity is causally related to

862 inhibition. Principally, differences in local activation can result from both local and inter-

863 areal connectivity (David et al., 2006). We used DCM to quantify network effects.

864 Bayesian model selection established a winning model as a hierarchical network in



865 which rDLPFC and rIFG sat at the top of the hierarchy and pre-SMA being below these  
 866 areas. The model also included nodes for right temporal (rTemporal), right inferior  
 867 occipital gyrus (rIOG), right parietal (rParietal), a hidden subcortical node (Deep) and  
 868 left motor cortex (M1). These results accord with networks proposed by previous studies  
 869 implicating both motor inhibition and attentional orienting (Weicki and Frank, 2013;  
 870 Munkata et al., 2011). The DCM (Fig. 5) was fit to individual subject's data to determine  
 871 how connectivity parameters differentiated (1) No-TFUS baseline SS and US inhibition  
 872 differences, and (2) between No-TFUS and Stop-TFUS SS trials and accompanying  
 873 changes in SSRT. The above approach revealed the models agreeably captured the  
 874 spatiotemporal properties of the ERP scalp data across both sets of model fits (Fig. 5).

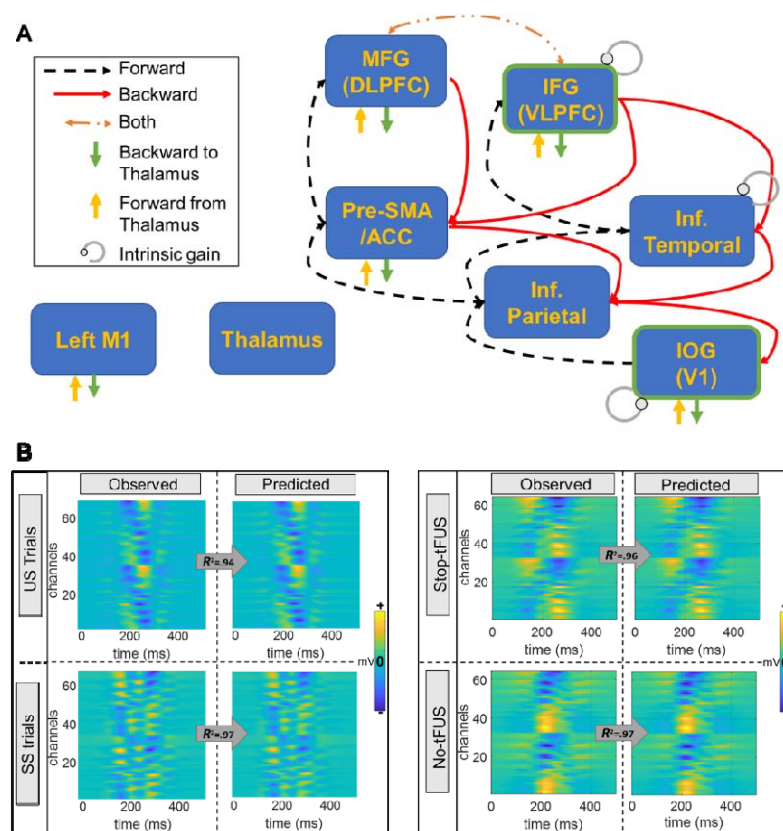

875

876 Figure 5. **A**. Connections used to implement the final dynamic causal model structure. Exogenous inputs  
 877 entered through rIFG and rIOG represented as a green box. All nodes except Left M1 and Thalamus

878 were all located in the right hemisphere. **B.** Left panel shows the mean observed and predicted scalp  
879 ERP data derived from the dynamic causal model fit to the No-TFUS US and SS trials. Right panel shows  
880 the mean observed and predicted scalp ERP data derived from the dynamic causal model fit to the No-  
881 TFUS SS and Stop-TFUS SS trials. These results show that the final model provided a good fit to the  
882 data. Data are plotted relative to stop signal onset (0 ms on x-axis).

883

884         The first set of analyses examined what connectivity parameters were altered  
885 during No-TFUS successful inhibition. The first comparison examined whether  
886 differential rIFG and pre-SMA interactions were related to baseline successful stopping,  
887 as suggested by several functional and anatomical studies (Duann et al., 2009; Rae et  
888 al., 2015; Swaan et al., 2012; Fig. 6A). Model comparisons revealed a winning family  
889 included interactions between both areas, but with a moderate posterior probability  
890 (0.78). BMA across families revealed both the connection from rIFG to pre-SMA (136%)  
891 and pre-SMA to rIFG (193%) were altered during SS trials. Changes in this connection  
892 suggest that SS trials were supported by prefrontal interactions. Considering previous  
893 data indicating increases in pre-SMA projections (Forstmann et al., 2008) to striatum  
894 render increased RTs, this result might reflect an effect of blocking the impetus pre-  
895 SMA provides towards responding to the Go signal (Verbruggen and Logan, 2009).

896         The next comparison tested the hypothesis that both pre-SMA and rIFG  
897 projections to deep areas are necessary for successful inhibition (Fig. 6B). Only a family  
898 including changes from rIFG to deep was predictive of successful inhibition. BMA  
899 indicated rIFG exhibited a mean reduction in the backwards connection of 65% during  
900 successful stopping. This result agrees with previous fMRI studies (Aron et al., 2006;  
901 Jahfari et al., 2011) indicating inhibitory processes are driven by cortical to basal ganglia  
902 interactions.

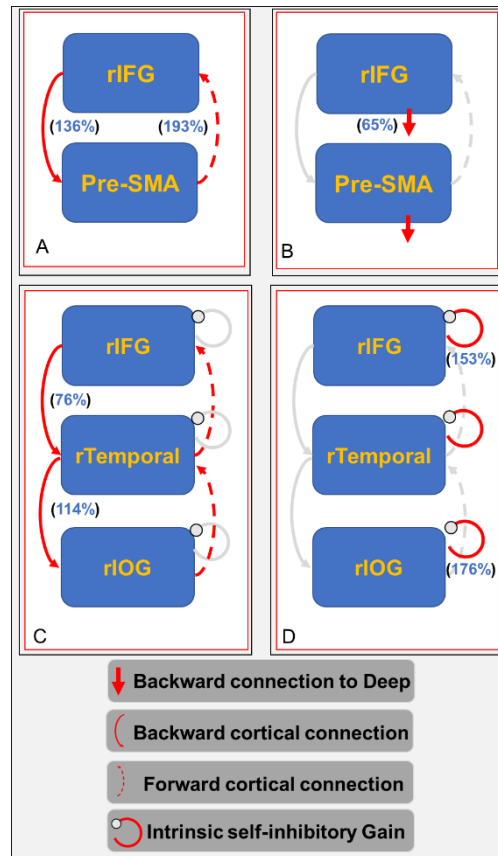

903

904 Figure 6. Family-based model comparison for different hypothesized interactions. Plots contain  
 905 modulatory parameter of connections with strong positive evidence as being different between US and  
 906 SS trials. Parameter estimates (>95% posterior probability) are in parentheses next to modulated  
 907 connection in exponential percentage change. Anything above 100% reflects an increase in SS trials  
 908 compared to US (opposite for below 100%). **A.** Test of rIFG and pre-Sma interactions. **B.** Tests of rIFG  
 909 and pre-SMA backward projections to deep node. **C.** Tests for the ventral pathway connections. **D.**  
 910 Comparison of intrinsic superficial pyramidal cell gains.

911

912 Another hypothesis that has been put forth regarding successful inhibition is that  
 913 it is mainly mediated by attentional orienting in ventral pathways (Hampshire and Sharp,  
 914 2015). DCM implementations of attentional process can be cast in terms of hierarchical  
 915 predictive coding models (Feldman and Friston, 2010). Previous work suggests  
 916 increased attention in sensory areas emerges as increased recurrent intrinsic gain  
 917 (increased disinhibition) of superficial pyramidal cells thought to report prediction errors  
 918 through forward connections (Auksztulewicz et al., 2015). In DCM, recurrent gains

919 would weight prediction error signals driven changes in top-down (backward)  
920 connections (Bastos et al, 2012). We designed the next two comparisons to examine  
921 whether SS trials exhibited these network changes. Extrinsic connection analysis in No-  
922 TFUS SS indicated a winning family including only changes in top-down backward  
923 connections predicted successful inhibition ( $P_p = 1$ ). BMA indicated, however, the  
924 inhibitory connection from rIFG to rTemporal was reduced while backward connections  
925 from rTemporal to rIOG increased in connectivity (Fig. 6C).

926 The final SS and US modulation comparison analyzed changes in recurrent  
927 gains of rIFG, rTemporal and rIOG (Fig. 6D). The winning model ( $P_p = 0.99$ ) included  
928 an increase in gain for both rIOG (176%) and rIFG (153%). Importantly, the increased  
929 rIOG gain is predicted by attentional orienting models of response inhibition (Hampshire  
930 and Sharp, 2015) and accords with previous DCM studies that have manipulated  
931 attentional cueing (Auksztulewicz et al., 2015). Mechanistically, the increased rIOG gain  
932 in SS trials results in ascending signal that has a larger effect on decreasing rIFG top-  
933 down expectation signals in backward connections.

### 934 **Stopping efficiency (SSRT) is driven by lower and prefrontal interactions**

935 Another primary goal of understanding inhibitory control is quantifying how the  
936 efficiency of stopping, evaluated through the SSRT, is implemented via network  
937 pathways. Previous work has employed between-subjects' correlations of SSRT and  
938 connectivity parameters to isolate the pathways involved in this process (e.g., Jahfari et  
939 al., 2011). Because previous studies using fMRI and a variety of connectivity methods  
940 revealed pre-SMA and rIFG to basal ganglia connections are correlated in different  
941 directions with SSRT (Jahfari et al., 2011), we adopted this approach when analyzing

942 the baseline No-TFUS SS versus US contrast. This correlational analysis indicated both  
943 connections were correlated in opposite directions with SSRT. Figure 7 shows that  
944 increasing connectivity from rIFG to deep targets predicted shorter SSRTs. The  
945 opposite pattern was found for pre-SMA, wherein increasing pre-SMA backward activity  
946 predicted longer SSRTs.

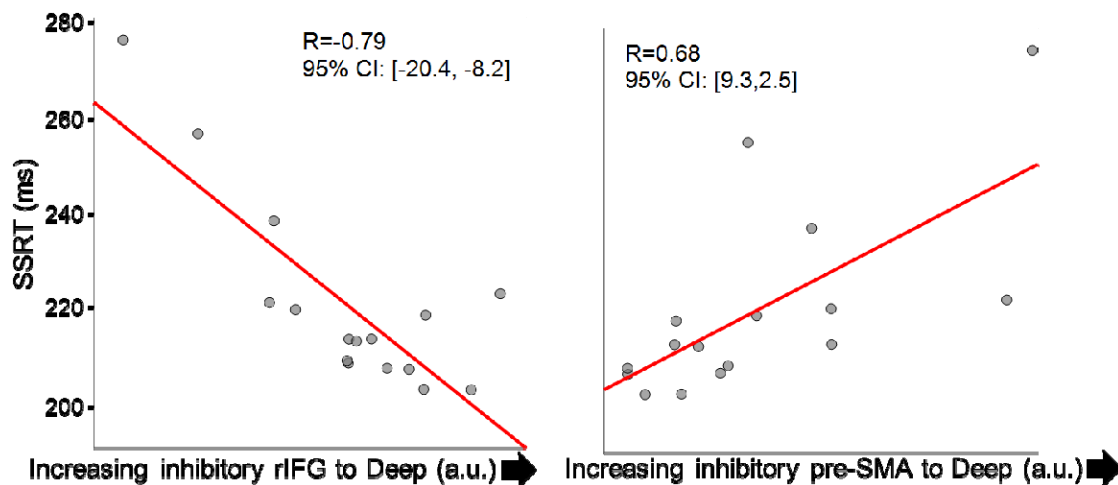

947

948 Figure 7. Left and right plots show linear regression fits predicting individual subjects' No-TFUS  
949 SSRT from the backward connection to the deep area projecting from rIFG and pre-SMA,  
950 respectively. Larger values on the x-axis denote decreasing backward inhibitory connectivity.

951

## 952 **TFUS to rIFG causally dissociates inhibitory mechanisms**

953 Building on TFUS's effect of increasing inhibition performance, a primary  
954 question was whether the changes in connectivity strength between No-TFUS SS and  
955 Stop-TFUS SS trials would reflect stepwise changes in the connections modulated in  
956 the SS and US No-TFUS comparison. This comparison is in line with the idea of failed  
957 stop trials resulting partially from less active inhibition mechanisms. By applying TFUS  
958 to rIFG, we were able to causally dissociate rIFG's role in implementing inhibitory

959 mechanisms. Below, mean changes represent the average modulation of connectivity  
960 going from No-TFUS SS to Stop-TFUS SS trials. SSRT-based effects represent how  
961 changes in SSRT between TFUS conditions predict the change in connectivity between  
962 TFUS conditions.

963 In first analyzing the family of models examining the rIFG and pre-SMA  
964 interaction, there was no clear winning family of models for both the mean and SSRT  
965 effect (Fig. 8A). For the mean, the model with projections from rIFG to pre-SMA (122%)  
966 and pre-SMA to rIFG (75%) was highest in probability ( $P_p = 0.79$ ). Of these  
967 connections, SSRT change was only negatively related to the rIFG to pre-SMA pathway  
968 ( $r^2 = 74\%$ ), indicating that an increase in inhibitory connectivity from rIFG to pre-SMA  
969 during Stop-TFUS trials predicted a larger change in SSRT. Therefore, changes in  
970 SSRT were not related to forward connections between these nodes, but instead were  
971 modulated by a top-down inhibitory modulation from rIFG to pre-SMA.

972 When comparing models testing the role of rIFG or pre-SMA to deep backward  
973 connections, family analysis revealed a strong effect of the mean change and SSRT  
974 change for both backward connections ( $P_p > 0.95$  both effects). BMA in the winning  
975 family indicated both effects were above threshold for both connections. Both rIFG  
976 (143%) and pre-SMA (139%) exhibited increased connectivity during TFUS. Concerning  
977 changes in TFUS related changes in SSRT, the direction of effects was opposite for  
978 rIFG (154%) and pre-SMA (67%): for rIFG, decreased inhibition yielded increased  
979 SSRT change, and the opposite for pre-SMA. Together, these results point to  
980 differential interactions of both pre-frontal areas with a deep node in responding to

981 TFUS. These results are further in line with the directionally opposite linear correlations  
982 of the No-TFUS SSRT to each of these backward connections (Fig. 8B).

983 Finally, we examined ventral pathway parameters for TFUS modulation of top-  
984 down, bottom-up, and intrinsic gain changes. Model averaging revealed the rIFG to  
985 rTemporal top-down connections (66%) decreased with TFUS, suggesting a direct  
986 effect from rIFG TFUS. This decrease in top-down rIFG connection agrees as well with  
987 the results found during the SS versus US comparison, suggesting a causal and  
988 overlapping pathway driving inhibition performance. All bottom-up connections  
989 increased as well (Fig. 8C). With respect to SSRT change (Figure 8D), only the bottom-  
990 up connections were related to changes in the SSRT. However, the forward connectivity  
991 relations to SSRT were in opposite directions for modulations of the rIOG to rTemporal  
992 (110%) and rTemporal to rIFG (78%). Finally, we found rTemporal recurrent gain  
993 increased in mean (150%) and was positively related to changes in SSRT (163%). This  
994 relation between the SSRT effect and rTemporal to rIFG forward connection was strong  
995 enough such that a leave-one-out cross validation prediction of SSRT change using this  
996 connection exhibited a large correlation with actual SSRT change (0.84,  $p < 0.01$ ).  
997 These results indicate neural implementation of stopping speed involves processing  
998 efficacy of bottom-up, temporal cortex (prediction error) signals.

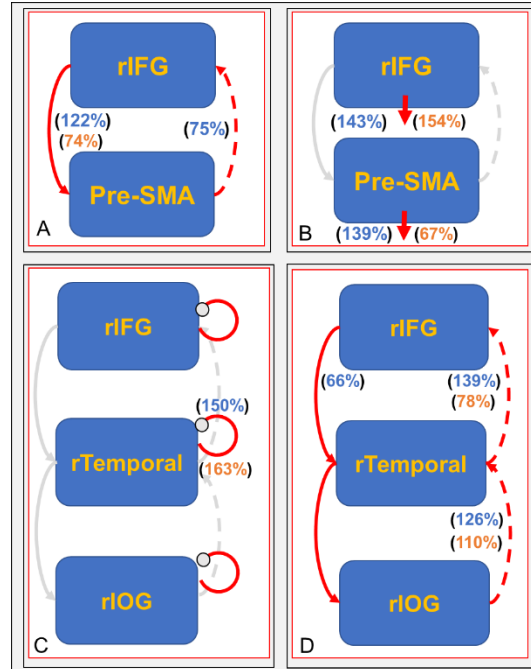

999

1000 Figure 8. Results of the family-based model comparison for different hypotheses tested when  
1001 comparing modulation from No-TFUS SS to Stop-TFUS SS trials. The family-based posterior  
1002 probability (F-Pp) for the winning model is listed below each model. The outcomes of these plots  
1003 can be interpreted of as revealing the modulatory parameters connections with very strong,  
1004 positive evidence of US and SS trials being different. Parameters estimates with a greater than  
1005 95% posterior probability in these families are presented in parentheses next to the modulated  
1006 connection. The parameters are presented in exponential form of percentage change. Values  
1007 above 100% equates to a parameter increase in SS trials compared to US (and the opposite for  
1008 values below 100%). Parameters in-active in each model are in a gray color. **A.** hypothesis test  
1009 of rIFG and pre-Sma interactions. **B.** Hypothesis tests of rIFG and pre-SMA backward  
1010 projections to deep node. **C.** comparison of intrinsic superficial pyramidal cell gains. **D.** tests for  
1011 the ventral pathway connections.

1012

1013

## Discussion

1014 The present study examined whether pars opercularis sector of rIFG is explicitly  
1015 involved in motor response inhibition. We used a stop-signal task, online TFUS, source-  
1016 localized EEG, and dynamic causal modeling of ERPs to examine this hypothesis and  
1017 examine underlying response inhibition network mechanisms. Behaviorally, TFUS  
1018 applied to pars opercularis and coincident with the stop signal increased the likelihood  
1019 of successful inhibition. Because TFUS enhancements of inhibition resulted from faster



1020 stopping processes (i.e., SSRT), without altering Go RTs, this supports pars opercularis'  
1021 role as directly triggering action stopping. Examination of scalp ERP analysis indicated  
1022 TFUS rendered a shift in the fronto-central P300 onset, which has been previously  
1023 hypothesized as neural marker of stopping speed (Wessel and Aron, 2015).  
1024 Imperatively, the shifted onsets were directly linked to and correlated with TFUS-  
1025 induced changes in individuals SSRT. Spatial accuracy of TFUS was supported by  
1026 whole-brain evoked activity indicating only pars opercularis exhibited a conjunction  
1027 effect of TFUS with successful compared to failed inhibition (Figure 3). The hypothesis  
1028 that pars opercularis activity is directly related to stopping efficacy was confirmed by  
1029 TFUS-driven activity differences predicting between-subjects SSRT change (Figure 4B).  
1030 Despite these results, recent work suggested TFUS effects result from auditory artifacts  
1031 (Sato et al., 2018). Auditory effects, however, cannot explain our findings because  
1032 control groups exhibited no behavioral effects, and no group exhibited evoked auditory  
1033 cortex activity (Figure S7). We interpret the above results as indicating TFUS selectively  
1034 modulated pars opercularis activity, and pars opercularis explicitly implements response  
1035 inhibition.

1036         Generally, response inhibition involves several processes embedded in  
1037 connections across a neural network, ranging from sensory cue detection, attention,  
1038 performance monitoring, and presumably explicit motor inhibition (Munkata et al., 2011;  
1039 Weicki and Frank, 2013; Wessel and Aron, 2017). Many have proposed that motor  
1040 inhibition is implemented directly in rIFG connectivity to basal ganglia (STN and  
1041 striatum), either in parallel or routed through pre-SMA (Aron et al., 2014), or both. In  
1042 contrast, others have proposed motor inhibition is better understood as an emergent

1043 outcome of attentional orienting and biased competition between neural processing of  
1044 response and inhibition cues (Hampshire and Sharp, 2015). Extant evidence indicates,  
1045 however, that motor inhibition and attentional processing are likely all involved in  
1046 different processing stages of inhibitory control tasks (Wessel and Aron, 2017).

1047         Given the evidence for response inhibition as a multi-process phenomenon, a  
1048 key question is what network connections and biophysical mechanisms support action  
1049 stopping. A core component of models positing a direct rIFG motor inhibitory process is  
1050 that its connectivity with subcortical nodes should change with stopping success or  
1051 efficacy. The present study's DCM analysis of No-TFUS successful and failed inhibition  
1052 is consistent with the hypothesis that rIFG and pre-SMA subcortical connections are  
1053 relevant for motor inhibition. DCM results of No-TFUS successful stopping also revealed  
1054 an anti-correlation of SSRT to pre-SMA and rIFG deep connection strength (Figure 7).  
1055 Our findings agree with another fMRI connectivity study (Jahfari et al., 2011) that found  
1056 successful stopping accompanied increasing pre-SMA to striatum connectivity and  
1057 predicted longer SSRTs, with the opposite correlation for rIFG to striatum. Pivotal  
1058 support for rIFG's role is the result that TFUS effects on SSRT were directly related to  
1059 changes in rIFG and pre-SMA to deep connectivity with a similar anti-correlation pattern  
1060 as the baseline. We take these results to indicate pars opercularis subcortical  
1061 connectivity is directly involved in driving motor inhibition through feedback pathways.  
1062 This indicate a potential mechanistic effect of TFUS, wherein inhibition improved by  
1063 altering the connectivity of layer V rIFG pyramidal neurons by increasing the excitability  
1064 of these cells. Notably, this conjecture of an excitatory TFUS effect on pyramidal  
1065 neurons and our TFUS parameterization are in accordance with the neuronal

1066 intramembrane cavitation excitation (NICE) model that has been used recently to  
1067 explain the acoustical stimulation effects on the biophysics of neuronal firing (see  
1068 Plaksin et al., 2016).

1069 An unresolved issue regarding the inhibition network is how rIFG and pre-SMA  
1070 interactions areas relate to inhibition in general (Duann et al., 2009; Swaan et al., 2012).  
1071 Our DCM optimization indicated rIFG projected to pre-SMA through backwards  
1072 inhibitory connections and pre-SMA to rIFG via excitatory forward connections. This  
1073 bidirectional connectivity agrees with previous fMRI stop-signal and DTI studies (Duann  
1074 et al., 2009; Rae et al., 2015). Functionally, No-TFUS DCM results revealed successful  
1075 stopping was accompanied by increases in both connections. However, when  
1076 comparing baseline and TFUS DCMs, our results indicate that only the rIFG to pre-SMA  
1077 connections in this subset of connections were effectively related to inhibition in terms of  
1078 the mean gain change in backwards connectivity and its covariation with TFUS induced  
1079 changes in SSRT (Figure 6A-B). This result is directly relevant to several studies that  
1080 have either concluded pre-SMA drives rIFG (Swann et al., 2011) during inhibition or the  
1081 opposite (Duann et al., 2009). Combining DCM and TFUS indicated the inhibitory effect  
1082 of rIFG onto pre-SMA is causally responsible for driving inhibition at a cortical level.  
1083 This raises the question of why the pre-SMA to rIFG connection was only relevant  
1084 during baseline successful inhibition. An alternative interpretation is found in  
1085 neuroimaging (Crone et al., 2006), ECoG (Swaan et al., 2012), and TMS studies of  
1086 proactive inhibition and response switching (Rushworth et al., 2002). These studies  
1087 have indicated pre-SMA encodes a set of potential actions. During response inhibition,  
1088 this predicts successful stopping involves pre-SMA signaling the action(stopping)-rule to

1089 rIFG. Therefore, the action rule and connectivity conveying it should not differ for  
1090 successful No-TFUS and Stop-TFUS trials because it should have been similarly  
1091 communicated under both conditions.

1092         The above results provide causal evidence that pars opercularis and its  
1093 connectivity are directly involved in motor inhibition. Nonetheless, neuroimaging studies  
1094 have shown rIFG-related activation predicts attentional orienting and stimulus  
1095 expectancy processes during response inhibition (Erika-Florence et al., 2014;  
1096 Hampshire and Sharp, 2015; Xu et al., 2017). Although attention was not manipulated in  
1097 our study, we derived predicted network mechanisms from predictive coding models of  
1098 attention (Feldman and Friston, 2010) and DCM-EEG studies directly manipulating  
1099 attention and stimulus expectancy (Auzztulewicz et al., 2015). Importantly, the  
1100 microcircuits implemented in the DCM presently used are directly related to predictive  
1101 coding models and have explicit mechanisms supported by previous DCM studies. For  
1102 example, these studies have shown increased attention is linked to increased recurrent  
1103 gain on ascending (forward) sensory (prediction error) signals, while violations of  
1104 stimulus expectations were linked to decreased top-down and increased in bottom-up  
1105 connectivity, respectively (Auzztulewicz et al., 2015; Fardo et al., 2017). Along these  
1106 lines, our DCM during baseline stopping featured increased rIOG recurrent gain as  
1107 expected if attention increased the precision afforded to the sensory processing of stop  
1108 cues (Moran et al., 2013; Figure 7C). Concerning top-down changes, rIFG to rTemporal  
1109 decreased and rTemporal to rIOG increased (Figure 7D). Successful stopping at  
1110 baseline therefore may rely on an increased rIOG gain weighted sensory signals that  
1111 drive top-down changes in rIFG. However, increased connectivity from rTemporal to

1112 rLOG seems at odds with this interpretation because it implies a larger reliance on top-  
1113 down information during successful stopping. This is explained by the finding that  
1114 optimized inputs to rLOG were negative and therefore inhibitory (rather than excitatory)  
1115 across subjects. Therefore, increasing rTemporal backward connectivity rendered an  
1116 enhanced negative rLOG signals.

1117         Although the preceding results seem to accord with attention-based formulations  
1118 of inhibition, examination of TFUS effects on connectivity indicate inhibition success  
1119 was generally unrelated to these mechanisms. The only overlap between baseline and  
1120 TFUS conditions was a decrease in top-down rIFG to rTemporal backwards  
1121 connectivity. Still, this effect was not directly predictive of a change in SSRT. TFUS  
1122 effects also involved an increase in bottom-up connectivity that was predictive of SSRT  
1123 change (Figure 8D) in agreement with expectation violation effects found in other EEG-  
1124 DCM studies (Auksztulewicz et al., 2015). The most interesting effect was recurrent  
1125 gains only increased in rTemporal, indicating SSRT changes were not due to increased  
1126 sensory weighting. We propose that cortically-related SSRT changes were driven by  
1127 TFUS altering the effects the rIFG to rTemporal connection had on the rTemporal gain.  
1128 A partial correlation supported this hypothesis by showing covariation of rTemporal gain  
1129 and SSRT change was rendered null when accounting for the correlation of rIFG to  
1130 rTemporal and rTemporal gain. A potential explanation for this result is that rIFG  
1131 engages in a proactive inhibitory function whereby it biases bottom-up processing of the  
1132 temporal cortex, which itself may encode the expected probability of stop signal  
1133 occurring. This interpretation is consistent with fMRI stop-signal studies demonstrating

1134 temporal cortex encodes a prediction error of stop-signal probability (Hu et al., 2015; Ide  
1135 et al., 2013).

1136 In summary, TFUS can induced enhanced response inhibition performance,  
1137 allowing the underlying mechanisms to be linked to direct and source-resolved  
1138 electrophysiological neural processes in humans. By pairing TFUS with DCM, we found  
1139 a network model of response inhibition suggesting pars opercularis explicitly invokes  
1140 motor inhibition through deep pyramidal connections directly synapsing onto subcortical  
1141 nodes, as well as pre-SMA and temporal cortex. These results also significantly extend  
1142 the possible applications by showing TFUS combined with network modeling has the  
1143 potential to alter and infer the effective connection between biophysical network  
1144 mechanisms and behavior.

1145

1146

1147

1148

1149

1150

1151

1152

1153

1154

1155

1156

1157

## References

- 1158
- 1159 Aron, A. R., Fletcher, P. C., Bullmore, E. T., Sahakian, B. J., & Robbins, T. W. (2003). Stop-  
1160 signal inhibition disrupted by damage to right inferior frontal gyrus in humans. *Nature*  
1161 *Neuroscience*. <https://doi.org/10.1038/nn1203-1329a>
- 1162 Aron, A. R., Robbins, T. W., & Poldrack, R. A. (2014). Inhibition and the right inferior frontal  
1163 cortex: one decade on. <https://doi.org/10.1016/j.tics.2013.12.003>
- 1164 Aron, A. R. (2006). Cortical and Subcortical Contributions to Stop Signal Response Inhibition:  
1165 Role of the Subthalamic Nucleus. *Journal of Neuroscience*.  
1166 <https://doi.org/10.1523/JNEUROSCI.4682-05.2006>
- 1167 Aron, A. R., Herz, D. M., Brown, P., Forstmann, B. U., & Zaghoul, K. (2016). Frontosubthalamic  
1168 Circuits for Control of Action and Cognition. *The Journal of Neuroscience*.  
1169 <https://doi.org/10.1523/jneurosci.2348-16.2016>
- 1170 Aubry, J.-F., Tanter, M., Pernot, M., Thomas, J.-L., & Fink, M. (2003). Experimental  
1171 demonstration of noninvasive transskull adaptive focusing based on prior computed  
1172 tomography scans. *The Journal of the Acoustical Society of America*.  
1173 <https://doi.org/10.1121/1.1529663>
- 1174 Auksztulewicz, R., & Friston, K. (2015). Attentional enhancement of auditory mismatch  
1175 responses: A DCM/MEG study. *Cerebral Cortex*. <https://doi.org/10.1093/cercor/bhu323>
- 1176 Baddeley, A. (1996). Exploring the Central Executive. *Quarterly Journal of Experimental*  
1177 *Psychology Section A: Human Experimental Psychology*.  
1178 <https://doi.org/10.1080/713755608>
- 1179 Bari, A., & Robbins, T. W. (2013). Inhibition and impulsivity: Behavioral and neural basis of  
1180 response control. *Progress in Neurobiology*.  
1181 <https://doi.org/10.1016/j.pneurobio.2013.06.005>
- 1182 Bastos, A. M., Usrey, W. M., Adams, R. A., Mangun, G. R., Fries, P., & Friston, K. J. (2012).  
1183 Canonical Microcircuits for Predictive Coding. *Neuron*.  
1184 <https://doi.org/10.1016/j.neuron.2012.10.038>
- 1185 Bates, D., Maechler, M., & Bolker, B. (2013). lme4: Linear mixed-effects models using S4  
1186 classes. *R Package Version 1.1-7*. <https://doi.org/citeulike-article-id:1080437>
- 1187 Bhatt, M. B., Bowen, S., Rossiter, H. E., Dupont-Hadwen, J., Moran, R. J., Friston, K. J., &  
1188 Ward, N. S. (2016). Computational modelling of movement-related beta-oscillatory  
1189 dynamics in human motor cortex. *NeuroImage*.  
1190 <https://doi.org/10.1016/j.neuroimage.2016.02.078>
- 1191 Boehler, C. N., Münte, T. F., Krebs, R. M., Heinze, H. J., Schoenfeld, M. A., & Hopf, J. M.  
1192 (2009). Sensory MEG responses predict successful and failed inhibition in a stop-signal  
1193 task. *Cerebral Cortex*. <https://doi.org/10.1093/cercor/bhn063>

- 1194 Boehler, C., Author, C., & Nicolas Boehler, C. (2010). Pinning down response inhibition in the  
1195 brain-conjunction analyses of the Stop-signal task4). *Neuroimage*, 52(1), 1621–1632.  
1196 <https://doi.org/10.1016/j.neuroimage.2010.04.276>
- 1197 Cai, W., George, J. S., Verbruggen, F., Chambers, C. D., & Aron, A. R. (2012). The role of the  
1198 right presupplementary motor area in stopping action: two studies with event-related  
1199 transcranial magnetic stimulation. *Journal of Neurophysiology*.  
1200 <https://doi.org/10.1152/jn.00132.2012>
- 1201 Chambers, C. D., Bellgrove, M. A., Stokes, M. G., Henderson, T. R., Garavan, H., Robertson, I.  
1202 H., ... Mattingley, J. B. (2006). Executive “brake failure” following deactivation of human  
1203 frontal lobe. *Journal of Cognitive Neuroscience*.  
1204 <https://doi.org/10.1162/089892906775990606>
- 1205 Chambers, C. D., Garavan, H., & Bellgrove, M. A. (2009). Insights into the neural basis of  
1206 response inhibition from cognitive and clinical neuroscience. *Neuroscience and*  
1207 *Biobehavioral Reviews*. <https://doi.org/10.1016/j.neubiorev.2008.08.016>
- 1208 Chatham, C. H., Claus, E. D., Kim, A., Curran, T., Banich, M. T., & Munakata, Y. (2012).  
1209 Cognitive control reflects context monitoring, not motoric stopping, in response inhibition.  
1210 *PLoS ONE*. <https://doi.org/10.1371/journal.pone.0031546>
- 1211 Chikazoe, J., Jimura, K., Asari, T., Yamashita, K. I., Morimoto, H., Hirose, S., ... Konishi, S.  
1212 (2009). Functional dissociation in right inferior frontal cortex during performance of go/no-  
1213 go task. *Cerebral Cortex*. <https://doi.org/10.1093/cercor/bhn065>
- 1214 Corbetta, M., & Shulman, G. L. (2002). Control of goal-directed and stimulus-driven attention in  
1215 the brain. *Nature Reviews. Neuroscience*. <https://doi.org/10.1038/nrn755>
- 1216 Crone, E. A., Wendelken, C., Donohue, S. E., & Bunge, S. A. (2006). Neural evidence for  
1217 dissociable components of task-switching. *Cerebral Cortex*.  
1218 <https://doi.org/10.1093/cercor/bhi127>
- 1219 David, O., Kiebel, S. J., Harrison, L. M., Mattout, J., Kilner, J. M., & Friston, K. J. (2006).  
1220 Dynamic causal modeling of evoked responses in EEG and MEG. *NeuroImage*.  
1221 <https://doi.org/10.1016/j.neuroimage.2005.10.045>
- 1222 David, O., Maess, B., Eckstein, K., & Friederici, A. D. (2011). Dynamic Causal Modeling of  
1223 Subcortical Connectivity of Language. *Journal of Neuroscience*.  
1224 <https://doi.org/10.1523/jneurosci.3433-10.2011>
- 1225 Delorme, A., & Makeig, S. (2004). EEGLAB: an open source toolbox for analysis of single-trial  
1226 EEG dynamics including independent component analysis. *Journal of Neuroscience*  
1227 *Methods*. <https://doi.org/10.1016/j.jneumeth.2003.10.009>
- 1228 Duann, J.-R., Ide, J. S., Luo, X., & Li, C. R. (2009). Functional connectivity delineates distinct  
1229 roles of the inferior frontal cortex and presupplementary motor area in stop signal inhibition.  
1230 *The Journal of Neuroscience* □: *The Official Journal of the Society for Neuroscience*,  
1231 29(32), 10171–10179. <https://doi.org/10.1523/JNEUROSCI.1300-09.2009>



- 1232 Evans, A. C., Kamber, M., Collins, D. L., & MacDonald, D. (1994). An MRI-Based Probabilistic  
1233 Atlas of Neuroanatomy. In *Magnetic Resonance Scanning and Epilepsy*.  
1234 [https://doi.org/10.1007/978-1-4615-2546-2\\_48](https://doi.org/10.1007/978-1-4615-2546-2_48)
- 1235 Erika-Florence, M., Leech, R., & Hampshire, A. (2014). A functional network perspective on  
1236 response inhibition and attentional control. *Nature Communications*.  
1237 <https://doi.org/10.1038/ncomms5073>
- 1238 Fardo, F., Auksztulewicz, R., Allen, M., Dietz, M. J., Roepstorff, A., & Friston, K. J. (2017).  
1239 Expectation violation and attention to pain jointly modulate neural gain in somatosensory  
1240 cortex. *NeuroImage*. <https://doi.org/10.1016/j.neuroimage.2017.03.041>
- 1241 Feldman, H., & Friston, K. J. (2010). Attention, Uncertainty, and Free-Energy. *Frontiers in*  
1242 *Human Neuroscience*. <https://doi.org/10.3389/fnhum.2010.00215>
- 1243 Fini, M., & Tyler, W. J. (2017). Transcranial focused ultrasound: a new tool for non-invasive  
1244 neuromodulation. *International Review of Psychiatry*.  
1245 <https://doi.org/10.1080/09540261.2017.1302924>
- 1246 Friston, K. J., Litvak, V., Oswal, A., Razi, A., Stephan, K. E., Van Wijk, B. C. M., ... Zeidman, P.  
1247 (2016). Bayesian model reduction and empirical Bayes for group (DCM) studies.  
1248 *NeuroImage*. <https://doi.org/10.1016/j.neuroimage.2015.11.015>
- 1249 Forstmann, B. U., Dutilh, G., Brown, S., Neumann, J., von Cramon, D. Y., Ridderinkhof, K. R., &  
1250 Wagenmakers, E.-J. (2008). Striatum and pre-SMA facilitate decision-making under time  
1251 pressure. *Proceedings of the National Academy of Sciences*.  
1252 <https://doi.org/10.1073/pnas.0805903105>
- 1253 Hampshire, A., Chamberlain, S. R., Monti, M. M., Duncan, J., & Owen, A. M. (2010). The role of  
1254 the right inferior frontal gyrus: inhibition and attentional control. *NeuroImage*.  
1255 <https://doi.org/10.1016/j.neuroimage.2009.12.109>
- 1256 Hampshire, A., & Sharp, D. J. (2015). Contrasting network and modular perspectives on  
1257 inhibitory control. *Trends in Cognitive Sciences*. <https://doi.org/10.1016/j.tics.2015.06.006>
- 1258 Hayner, M., & Hynynen, K. (2002). Numerical analysis of ultrasonic transmission and absorption  
1259 of oblique plane waves through the human skull. *The Journal of the Acoustical Society of*  
1260 *America*. <https://doi.org/10.1121/1.1410964>
- 1261 Haynes, W. I. A., & Haber, S. N. (2013). The Organization of Prefrontal-Subthalamic Inputs in  
1262 Primates Provides an Anatomical Substrate for Both Functional Specificity and Integration:  
1263 Implications for Basal Ganglia Models and Deep Brain Stimulation. *Journal of*  
1264 *Neuroscience*. <https://doi.org/10.1523/jneurosci.4674-12.2013>
- 1265 Hu, S., Ide, J. S., Zhang, S., & Li, C. shan R. (2015). Anticipating conflict: Neural correlates of a  
1266 Bayesian belief and its motor consequence. *NeuroImage*.  
1267 <https://doi.org/10.1016/j.neuroimage.2015.06.032>

- 1268 Huster, R. J., Enriquez-Geppert, S., Lavalley, C. F., Falkenstein, M., & Herrmann, C. S. (2013).  
1269 Electroencephalography of response inhibition tasks: Functional networks and cognitive  
1270 contributions. *International Journal of Psychophysiology*.  
1271 <https://doi.org/10.1016/j.ijpsycho.2012.08.001>
- 1272 Ide, J. S., Shenoy, P., Yu, A. J., & Li, C. -s. R. (2013). Bayesian Prediction and Evaluation in the  
1273 Anterior Cingulate Cortex. *Journal of Neuroscience*. [https://doi.org/10.1523/jneurosci.2201-](https://doi.org/10.1523/jneurosci.2201-12.2013)  
1274 [12.2013](https://doi.org/10.1523/jneurosci.2201-12.2013)
- 1275 Jahfari, S., Waldorp, L., van den Wildenberg, W. P. M., Scholte, H. S., Ridderinkhof, K. R., &  
1276 Forstmann, B. U. (2011). Effective Connectivity Reveals Important Roles for Both the  
1277 Hyperdirect (Fronto-Subthalamic) and the Indirect (Fronto-Striatal-Pallidal) Fronto-Basal  
1278 Ganglia Pathways during Response Inhibition. *Journal of Neuroscience*.  
1279 <https://doi.org/10.1523/JNEUROSCI.5253-10.2011>
- 1280 Kenemans, J. L. (2015). Specific proactive and generic reactive inhibition. *Neuroscience and*  
1281 *Biobehavioral Reviews*. <https://doi.org/10.1016/j.neubiorev.2015.06.011>
- 1282 Levy, B. J., & Wagner, A. D. (2011). Cognitive control and right ventrolateral prefrontal cortex:  
1283 Reflexive reorienting, motor inhibition, and action updating. *Annals of the New York*  
1284 *Academy of Sciences*. <https://doi.org/10.1111/j.1749-6632.2011.05958.x>
- 1285 Lee, W., Kim, H. C., Jung, Y., Chung, Y. A., Song, I. U., Lee, J. H., & Yoo, S. S. (2016).  
1286 Transcranial focused ultrasound stimulation of human primary visual cortex. *Scientific*  
1287 *Reports*. <https://doi.org/10.1038/srep34026>
- 1288 Legon, W., Sato, T. F., Opitz, A., Mueller, J., Barbour, A., Williams, A., & Tyler, W. J. (2014).  
1289 Transcranial focused ultrasound modulates the activity of primary somatosensory cortex in  
1290 humans. *Nature Neuroscience*. <https://doi.org/10.1038/nn.3620>
- 1291 Legon, W., Bansal, P., Tyshynsky, R., Ai, L., & Mueller, J. K. (2018). Transcranial focused  
1292 ultrasound neuromodulation of the human primary motor cortex. *Scientific Reports*.  
1293 <https://doi.org/10.1038/s41598-018-28320-1>
- 1294 Litvak, V., Garrido, M., Zeidman, P., & Friston, K. (2015). Empirical Bayes for Group (DCM)  
1295 Studies: A Reproducibility Study. *Frontiers in Human Neuroscience*.  
1296 <https://doi.org/10.3389/fnhum.2015.00670>
- 1297 Logan, G. D., & Cowan, W. B. (1984). On the ability to inhibit thought and action: A theory of an  
1298 act of control. *Psychological Review*. <https://doi.org/10.1037/0033-295X.91.3.295>
- 1299 Mallet, N., Schmidt, R., Leventhal, D., Chen, F., Amer, N., Boraud, T., & Berke, J. D. (2016).  
1300 Arkypallidal Cells Send a Stop Signal to Striatum. *Neuron*.  
1301 <https://doi.org/10.1016/j.neuron.2015.12.017>
- 1302 Mathôt, S., Schreij, D., & Theeuwes, J. (2012). OpenSesame: An open-source, graphical  
1303 experiment builder for the social sciences. *Behavior Research Methods*.  
1304 <https://doi.org/10.3758/s13428-011-0168-7>

- 1305 Mattia, M., Spadacenta, S., Pavone, L., Quarato, P., Esposito, V., Sparano, A., ... Mirabella, G.  
1306 (2012). Stop-event-related potentials from intracranial electrodes reveal a key role of  
1307 premotor and motor cortices in stopping ongoing movements. *Frontiers in*  
1308 *Neuroengineering*. <https://doi.org/10.3389/fneng.2012.00012>
- 1309 Matzke, D., Love, J., Wiecki, T. V., Brown, S. D., Logan, G. D., & Wagenmakers, E. J. (2013).  
1310 Release the BEESTS: Bayesian Estimation of Ex-Gaussian STop-Signal reaction time  
1311 distributions. *Frontiers in Psychology*. <https://doi.org/10.3389/fpsyg.2013.00918>
- 1312 Moran, R. J., Campo, P., Symmonds, M., Stephan, K. E., Dolan, R. J., & Friston, K. J. (2013).  
1313 Free Energy, Precision and Learning: The Role of Cholinergic Neuromodulation. *Journal of*  
1314 *Neuroscience*. <https://doi.org/10.1523/JNEUROSCI.4255-12.2013>
- 1315 Morein-Zamir, S., Dodds, C., van Hartevelt, T. J., Schwarzkopf, W., Sahakian, B., Müller, U., &  
1316 Robbins, T. (2014). Hypoactivation in right inferior frontal cortex is specifically associated  
1317 with motor response inhibition in adult ADHD. *Human Brain Mapping*.  
1318 <https://doi.org/10.1002/hbm.22539>
- 1319 Munakata, Y., Herd, S. A., Chatham, C. H., Depue, B. E., Banich, M. T., & O'reilly, R. C. (2011).  
1320 A unified framework for inhibitory control Opinion. *Trends in Cognitive Sciences*, 15(10),  
1321 453–459. <https://doi.org/10.1016/j.tics.2011.07.011>
- 1322 Obeso, I., Robles, N., Marrón, E. M., & Redolar-Ripoll, D. (2013). Dissociating the Role of the  
1323 pre-SMA in Response Inhibition and Switching: A Combined Online and Offline TMS  
1324 Approach. *Frontiers in Human Neuroscience*. <https://doi.org/10.3389/fnhum.2013.00150>
- 1325 Opitz, A., Legon, W., Rowlands, A., Bickel, W. K., Paulus, W., & Tyler, W. J. (2013).  
1326 Physiological observations validate finite element models for estimating subject-specific  
1327 electric field distributions induced by transcranial magnetic stimulation of the human motor  
1328 cortex. *NeuroImage*. <https://doi.org/10.1016/j.neuroimage.2013.04.067>
- 1329 Penny, W. D., Stephan, K. E., Daunizeau, J., Rosa, M. J., Friston, K. J., Schofield, T. M., & Leff,  
1330 A. P. (2010). Comparing families of dynamic causal models. *PLoS Computational Biology*.  
1331 <https://doi.org/10.1371/journal.pcbi.1000709>
- 1332 Plaksin, M., Kimmel, E., & Shoham, S. (2016). Cell-Type-Selective Effects of Intramembrane  
1333 Cavitation as a Unifying Theoretical Framework for Ultrasonic Neuromodulation. *ENeuro*.  
1334 <https://doi.org/10.1523/eneuro.0136-15.2016>
- 1335 Rae, C. L., Hughes, L. E., Anderson, M. C., & Rowe, J. B. (2015). The prefrontal cortex  
1336 achieves inhibitory control by facilitating subcortical motor pathway connectivity. *The*  
1337 *Journal of Neuroscience* □: *The Official Journal of the Society for Neuroscience*.  
1338 <https://doi.org/10.1523/JNEUROSCI.3093-13.2015>
- 1339 Ray Li, C. -s. (2006). Imaging Response Inhibition in a Stop-Signal Task: Neural Correlates  
1340 Independent of Signal Monitoring and Post-Response Processing. *Journal of*  
1341 *Neuroscience*. <https://doi.org/10.1523/jneurosci.3741-05.2006>

- 1342 Sato, T., Shapiro, M. G., & Tsao, D. Y. (2018). Ultrasonic Neuromodulation Causes Widespread  
1343 Cortical Activation via an Indirect Auditory Mechanism. *Neuron*.  
1344 <https://doi.org/10.1016/j.neuron.2018.05.009>
- 1345 Schmajuk, M., Liotti, M., Busse, L., & Woldorff, M. G. (2006). Electrophysiological activity  
1346 underlying inhibitory control processes in normal adults. *Neuropsychologia*.  
1347 <https://doi.org/10.1016/j.neuropsychologia.2005.06.005>
- 1348 Sharp, D. J., Bonnelle, V., De Boissezon, X., Beckmann, C. F., James, S. G., Patel, M. C., &  
1349 Mehta, M. A. (2010). Distinct frontal systems for response inhibition, attentional capture,  
1350 and error processing. *Proceedings of the National Academy of Sciences*.  
1351 <https://doi.org/10.1073/pnas.1000175107>
- 1352 Shulman, G. L., Astafiev, S. V., Franke, D., Pope, D. L. W., Snyder, A. Z., McAvoy, M. P., &  
1353 Corbetta, M. (2009). Interaction of Stimulus-Driven Reorienting and Expectation in Ventral  
1354 and Dorsal Frontoparietal and Basal Ganglia-Cortical Networks. *Journal of Neuroscience*.  
1355 <https://doi.org/10.1523/jneurosci.5609-08.2009>
- 1356 Swann, N. C., Cai, W., Conner, C. R., Pieters, T. A., Claffey, M. P., George, J. S., ... Tandon, N.  
1357 (2012). Roles for the pre-supplementary motor area and the right inferior frontal gyrus in  
1358 stopping action: Electrophysiological responses and functional and structural connectivity.  
1359 *NeuroImage*. <https://doi.org/10.1016/j.neuroimage.2011.09.049>
- 1360 Tomaiuolo, F., MacDonald, J. D., Caramanos, Z., Posner, G., Chiavaras, M., Evans, A. C., &  
1361 Petrides, M. (1999). Morphology, morphometry and probability mapping of the pars  
1362 opercularis of the inferior frontal gyrus: An in vivo MRI analysis. *European Journal of*  
1363 *Neuroscience*. <https://doi.org/10.1046/j.1460-9568.1999.00718.x>
- 1364 Treeby, B. E., & Cox, B. T. (2010). k-Wave: MATLAB toolbox for the simulation and  
1365 reconstruction of photoacoustic wave fields. *Journal of Biomedical Optics*.  
1366 <https://doi.org/10.1117/1.3360308>
- 1367 Verbruggen, F., & Logan, G. D. (2009). Models of response inhibition in the stop-signal and  
1368 stop-change paradigms. *Neuroscience and Biobehavioral Reviews*.  
1369 <https://doi.org/10.1016/j.neubiorev.2008.08.014>
- 1370 Verbruggen, F., Aron, A. R., Stevens, M. A., & Chambers, C. D. (2010). Theta burst stimulation  
1371 dissociates attention and action updating in human inferior frontal cortex. *Proceedings of*  
1372 *the National Academy of Sciences*. <https://doi.org/10.1073/pnas.1001957107>
- 1373 Vossel, S., Thiel, C. M., & Fink, G. R. (2006). Cue validity modulates the neural correlates of  
1374 covert endogenous orienting of attention in parietal and frontal cortex. *NeuroImage*.  
1375 <https://doi.org/10.1016/j.neuroimage.2006.05.019>
- 1376 Wessel, J. R., & Aron, A. R. (2015). It's not too late: The onset of the frontocentral P3 indexes  
1377 successful response inhibition in the stop-signal paradigm. *Psychophysiology*.  
1378 <https://doi.org/10.1111/psyp.12374>

- 1379 Wessel, J. R., & Aron, A. R. (2017). On the Globality of Motor Suppression: Unexpected Events  
1380 and Their Influence on Behavior and Cognition. *Neuron*.  
1381 <https://doi.org/10.1016/j.neuron.2016.12.013>
- 1382 White, P. J., Clement, G. T., & Hynynen, K. (2006). Local frequency dependence in transcranial  
1383 ultrasound transmission. In *AIP Conference Proceedings*.  
1384 <https://doi.org/10.1063/1.2205477>
- 1385 Wiecki, T. V., & Frank, M. J. (2013). A computational model of inhibitory control in frontal cortex  
1386 and basal ganglia. *Psychological Review*. <https://doi.org/10.1037/a0031542>
- 1387 Xu, K. Z., Anderson, B. A., Emeric, E. E., Sali, A. W., Stuphorn, V., Yantis, S., & Courtney  
1388 Correspondence, S. M. (2017). Neural Basis of Cognitive Control over Movement  
1389 Inhibition: Human fMRI and Primate Electrophysiology Evidence. *Neuron*, 96.  
1390 <https://doi.org/10.1016/j.neuron.2017.11.010>
- 1391 Yamawaki, N., Borges, K., Suter, B. A., Harris, K. D., & Shepherd, G. M. G. (2014). A genuine  
1392 layer 4 in motor cortex with prototypical synaptic circuit connectivity. *ELife*.  
1393 <https://doi.org/10.7554/eLife.05422>
- 1394
- 1395
- 1396
- 1397
- 1398
- 1399
- 1400
- 1401
- 1402
- 1403
- 1404
- 1405
- 1406
- 1407
- 1408

1409

## Supplementary Materials

### 1410 S1. Dynamic causal modeling structure optimization

1411 Below we show the structures used for building and optimizing the dynamic causal  
 1412 model based on the no-TFUS successful stopping event related potentials. The full steps of the  
 1413 process are described in the Methods section. Figure S1 shows the tested structures and  
 1414 possible connections. Figure S2 shows outputs for comparing these models using Bayesian  
 1415 model comparisons, as well as model comparisons for which nodes receiving thalamic input,  
 1416 and tests for the type of connection projecting from cortical to deep areas (forward, backward, or  
 1417 both).

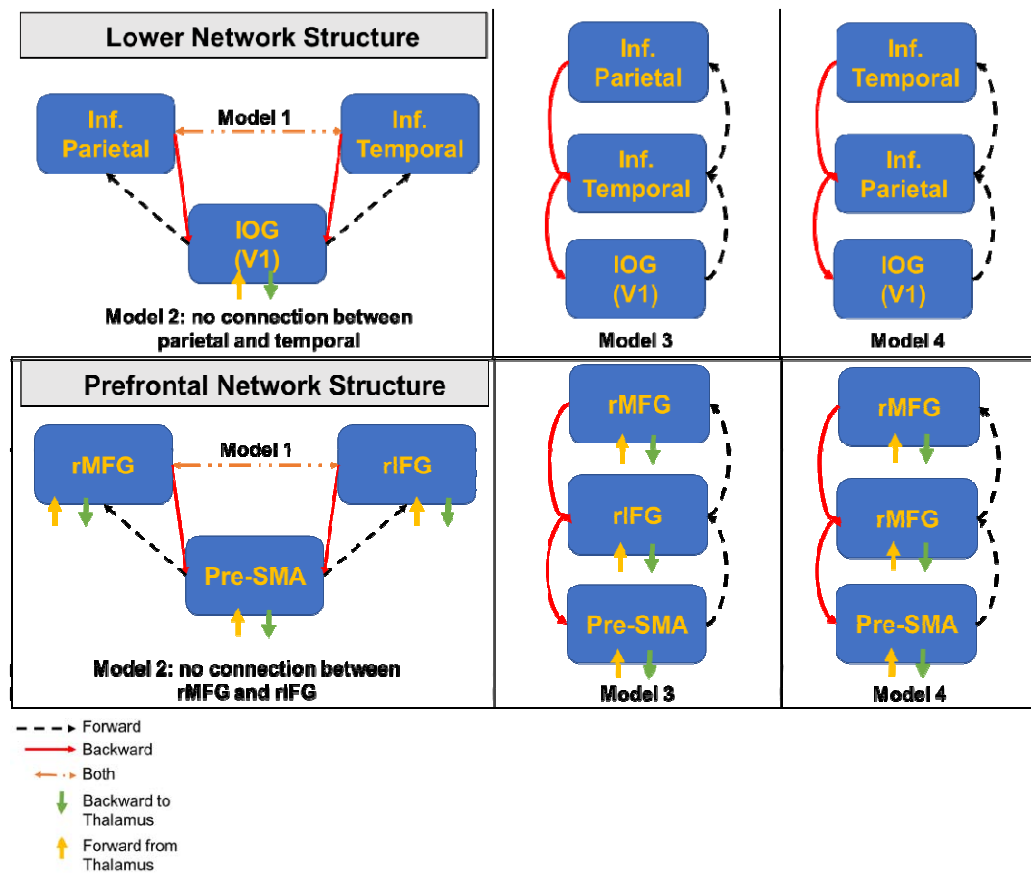

1418

1419 Figure S1. Differences in dynamic causal model spaces that were compared for the lower network  
 1420 structure and prefrontal network structure (top and bottom panel, respectively). The legend on the bottom  
 1421 shows how different connections are coded in these putative model spaces.

### Model structure optimization on mean no-tFUS SS trials

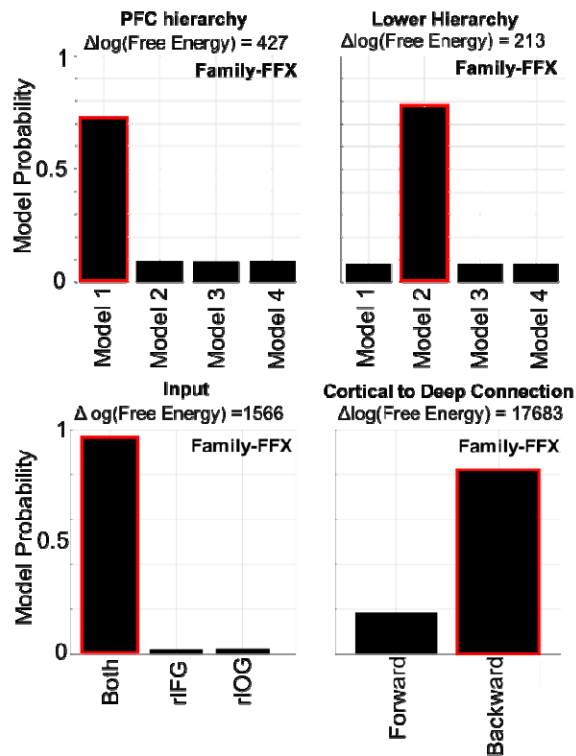

1422

1423 Figure S2. Model probabilities for the different model tests. Each of these tests was examined on the  
1424 mean ERP data for No-TFUS SS trials using family-wise fixed effect Bayesian model selection. Above  
1425 each plot shows the model component being optimized. For example, the first bar plot shows the different  
1426 prefrontal hierarchy arrangements. Above each plot is the difference in log-free energy between the best  
1427 family and the 2<sup>nd</sup> best. The log difference of free energies approximates a log-Bayes factor (Penny,  
1428 2012). It is considered positive evidence in favor of a model if this value is  $> 5$ . Evidence in favor of the  
1429 winning models (bars enclosed in red) was very strong. The plots on the right show the different structural  
1430 arrangements used to examine the prefrontal and lower-level hierarchical structure.

1431

1432

### 1433 S2. Go Reaction Times

1434 We addressed whether TFUS (real or sham) exerted any effects on simply responding to  
1435 the Go signal. We analyzed this by extracting the ex-gaussian-based mean RT using a  
1436 maximum likelihood approach (Lacoutoure and Cousineau, 2008). The means were calculated  
1437 separately for all subjects, and then analyzed using a  $3 \times 2$  mixed-design ANOVA with factors of  
1438 the 3 groups, and TFUS state: No-TFUS and Go-TFUS trials. This analysis allowed us to  
1439 assess if “going”, independent of “stopping”, was altered by potential TFUS auditory artifacts,

1440 stimulation to unrelated areas (S1 group), or whether TFUS to rIFG also influenced Go RT  
1441 processes independent of a stopping context signal. Table 1 shows the per group mean  
1442 difference of the RT between No-TFUS and Go-TFUS per group. Across groups, there was a  
1443 consistent negative difference indicating that RTs during TFUS may have been slightly shorter.  
1444 These differences in means seemed marginally larger for the rIFG group. However, the ANOVA  
1445 did not reveal any significant effect of TFUS, group, or their interaction (all  $p > 0.05$ ). These  
1446 results suggest that neither TFUS (rIFG and S1 groups) nor auditory factors alone (sham rIFG  
1447 group) altered Go RTs independent of a stop signal.

### 1448 **S3. Signal-respond RTs and context independence**

1449 Calculating a measure of stopping latency (SSRT) based on the independent race-  
1450 model (Logan and Cowan, 1984; Bissett and Logan, 2014) assumes that signal-respond RTs  
1451 are Go processes resulting from a censoring of the Go RT distribution. Testing this assumption  
1452 predicts that (a) mean signal-respond RT should be faster than mean Go RT, and (b) during  
1453 fixed-SSD paradigms like the one employed here, signal-respond RT should increase with  
1454 longer SSDs because there are more failed inhibitory responses. Before testing (a) and (b), we  
1455 wanted to discern whether our TFUS manipulation exerted any effects on the signal-respond  
1456 RTs. Based on the context-independence assumption of the race model that signal-respond  
1457 RTs are Go processes escaping inhibition, and (2) if the TFUS-driven changes in inhibition  
1458 ( $P(\text{respond}|\text{signal})$ ) (Fig. 3) are due to changes in inhibition, we should expect no differences in  
1459 signal-respond RTs between conditions or groups. We used a mixed-design ANOVA to examine  
1460 the subject level signal-respond RT means with Group (3 levels) and TFUS (3 levels: no-TFUS,  
1461 Go-TFUS, Stop-TFUS). We found no significant interactions or effects. Importantly, follow-up t-  
1462 tests revealed no differences across TFUS conditions within the rIFG group (mean signal-  
1463 respond RT: no-TFUS:  $375 \pm 18$  ms; Go-TFUS:  $368 \pm 13$  ms; Stop TFUS:  $353 \pm 13$  ms). This



1464 supports the conclusion that TFUS did not alter the mean of Go processes that escaped  
1465 inhibition.

1466           Given the lack of difference in mean signal-respond RTs (across all SSDs) across TFUS  
1467 conditions, we collapsed these RT means across TFUS conditions and compared them to each  
1468 subject's mean Go RT with a mixed-design ANOVA. There was no interaction or Group  
1469 differences ( $p > 0.05$ ). As expected, the mean signal-respond RT (all groups:  $365 \pm 15$ ) was  
1470 significantly shorter ( $F(1,50) = 89.77, p < 0.0001$ ) than the mean Go RT (all groups:  $436 \pm 22$ ).  
1471 Next, we examined whether the signal-respond RT increased with increasing SSD by  
1472 regressing all subjects' signal-respond RTs (collapsed across TFUS conditions) onto their SSDs  
1473 to obtain a single-slope parameter. This revealed a significant regression slope of 0.44 ( $p <$   
1474  $0.001$ ), indicating signal-respond RTs did increase with increasing SSD.

1475           Having confirmed that TFUS did not alter signal-respond RTs or the Go RTs, we sought  
1476 to test the context-independence assumption of the race model. This has been done in several  
1477 ways (see Bissett, 2014 for a non-parametric approach). The standard approach for examining  
1478 this assumption is comparing predicted signal-respond RTs from fitting the independent race  
1479 model to the observed signal-respond RTs (Verbruggen and Logan, 2009). The independence  
1480 assumption is typically assessed by showing that observed signal-respond RTs and those  
1481 predicted by the independent race model are not different. Because we used a parametric (ex-  
1482 gaussian) based approach to estimate the SSRT (Matzke et al, 2013), we verified these derived  
1483 fits by using a posterior predictive model comparison to the observed data. The models were  
1484 used to simulate 500 predictive distributions of signal-respond RTs to estimate the absolute  
1485 goodness of fit (Gelman & Hill, 2007) to each individual subject's signal-respond RT. This  
1486 approach generates  $p$ -values that test for the difference in the predicted and observed signal-  
1487 respond RTs at each SSD level. The typical metric for assuming goodness of fit is that the  $p$ -  
1488 value is close to 0.5, while being below and above 0.05 and 0.95, respectively, is considered a

1489 poorly predictive model. As pointed out by Matzke et al. (2013), these estimates are most stable  
1490 for SSDs in which several signal-respond RTs are observed. Therefore, we analyzed each  
1491 subject's  $p$ -values averaged across the two highest SSDs.

1492 The mixed-design ANOVA across groups and TFUS conditions did not reveal any  
1493 effects or interaction on the  $p$ -values. This result also agrees with the analysis showing no  
1494 differences in signal-respond RTs between TFUS conditions, indicating the Bayesian procedure  
1495 for estimating SSRT provided accurate predictions of signal-respond RTs. For all participants,  
1496 the  $p$ -values were in the range of 0.1 to 0.9 with a mean of 0.48 and standard deviation of 0.2.

1497

#### 1498 **S4. SSRT Variability was not altered by TFUS.**

1499 One possible driver of increased response inhibition performance in the rIFG TFUS  
1500 group is that it may have reduced within-subject SSRT variability. Therefore, as TFUS did not  
1501 alter mean or variance of Go RTs, if it reduced SSRT variability, this would increase the  
1502 likelihood of successful inhibition. Using the same statistical approach for the mean SSRT in the  
1503 main text, we found no significant effects of SSRT variability between any of the conditions (all  $p$   
1504  $> 0.05$ ).

1505

#### 1506 **S5. SS (No-TFUS) – SS (Stop-TFUS) whole-brain regression table**

1507 Table S1 lists the peak coordinates of clusters of the difference in evoked activity of No-  
1508 TFUS and Stop-TFUS SS with the between-subjects changes in SSRT. These coordinates were  
1509 used to identify which areas exhibited differential activation with respect to the speed of  
1510 stopping across subjects. Coordinates for relevant regions of interest were used as prior  
1511 locations in subsequent dynamic causal modeling in the main text.

1512

| Regression of $\Delta$ SSRT and SS (No-TFUS) – SS (Stop-TFUS) |                      |                      |                              |         |                 |
|---------------------------------------------------------------|----------------------|----------------------|------------------------------|---------|-----------------|
| Time-Window (ms)                                              | Regression Direction | Region               | Peak Coordinates (X,Y,Z MNI) | Z-value | Extent (Voxels) |
| -40:20                                                        | Positive             | R Supramarginal      | 56, -40, 16                  | 2.05    | 316             |
|                                                               |                      | L Supramarginal      | -56, -50, 18                 | 1.94    | 123             |
|                                                               | Negative             | R Inferior Temporal  | 40, -4, -40                  | 1.92    | 45              |
|                                                               |                      | R Inferior Frontal   | 40, 30, 10                   | 1.94    | 55              |
| 20:100                                                        | Negative             | R Inferior Frontal   | 56, 28, 12                   | 2.64    | 455             |
| 100:180                                                       | Positive             | R Superior Frontal   | 26, 50, 18                   | 3.18    | 568             |
|                                                               |                      | R Paracentral Lobule | 6, -20, 68                   | 2.98    | 389             |
|                                                               |                      | L Paracentral Lobule | -6, -20, 68                  | 2.94    | 563             |
|                                                               |                      | L Superior Frontal   | 22, 52, 28                   | 2.74    | 574             |
|                                                               | Negative             | L Supramarginal      | -60, -28, 38                 | 1.76    | 52              |
| 180:260                                                       | Negative             | R Inferior Occipital | 46, -82, -6                  | 4.12    | 41              |
|                                                               |                      | R Inferior Temporal  | 58, -40, -24                 | 3.62    | 552             |
|                                                               |                      | L Inferior Temporal  | -58, -38, -18                | 3.55    | 342             |
|                                                               |                      | R Middle Temporal    | 62, -2, -24                  | 3.16    | 22              |
| 260:340                                                       | Positive             | L inferior Frontal   | -46, 14, 32                  | 4.25    | 39              |
|                                                               |                      | L Middle Frontal     | -30, 22, 34                  | 2.84    | 236             |
|                                                               |                      | R Middle Frontal     | 26, 14, 42                   | 2.61    | 442             |
|                                                               | Negative             | R Angular            | 44, -62, 38                  | 3.62    | 62              |
|                                                               |                      | L Postcentral        | -42, -34, 52                 | 2.91    | 92              |
|                                                               |                      | R Middle Temporal    | 50, 8, -30                   | 2.81    | 73              |

1513 Table S1. Significant regions of regression for the change in TFUS induced SSRT.

1514

## 1515 S6. Whole-brain SPM analysis

1516 We performed a whole-brain SPM analysis for (1) positive t-contrast for SS (No-TFUS) –

1517 SS (Stop-TFUS) trials to examine where activity was larger for TFUS compared to No-TFUS

1518 trials, (2) SS-US main effects, and (3) TFUS main effect. In all of the analysis below, we used a  
1519 cluster-forming voxel threshold of  $p < 0.005$

1520 SS-SS *t*-contrast. In the stop-signal locked window (-40:20 ms), we found differences in  
1521 left supramarginal gyrus. In the N100 window (20:100 ms), the contrast was significant, as  
1522 anticipated, in rIFG. This result supports our scalp ERP measures and previous results  
1523 indicating that an N100 occurs in the rIFG that is predictive of stop success. In the N200 window  
1524 (100:180 ms), we found increased source activity in TFUS trials in bilateral clusters with  
1525 locations indicative of pre-SMA (Mayka et al., 2006). Consideration of the fourth time window  
1526 (180:260 ms), which overlapped with the SSRT, revealed that only the right inferior occipital  
1527 area produced a larger response in TFUS trials. In the last window (260:340 ms), we found  
1528 clusters of activity larger in TFUS trials for left superior occipital, right cuneus, and anterior  
1529 cingulate. Because this window always occurred after the SSRT for both No-TFUS and TFUS  
1530 conditions, it is likely these changes in activity represent a component of performance  
1531 monitoring rather than inhibition *per se*. Examination of the contrast for larger No-TFUS SS trial  
1532 activity revealed this contrast was only significant in the latest time-window (260:340 ms). This  
1533 contrast indicated source ERP activity was larger in No-TFUS trials in bilateral postcentral gyrus  
1534 clusters. An important result from these contrasts is the primary areas in which activity was  
1535 larger during TFUS trials. We found that both rIFG and pre-SMA activity coincided with  
1536 increased TFUS-related stopping. Interestingly, this analysis confirmed that rIFG differences  
1537 occurred before those in pre-SMA. However, a temporal precedent of change in ERP does not  
1538 necessitate that stopping-related changes occurred in rIFG before pre-SMA. The source cluster  
1539 MNI locations and cluster sizes are presented in Table S2.

1540

1541

| <b>SS (No-TFUS) – SS (Stop-locked TFUS)</b>                    |                      |                          |                              |         |                 |
|----------------------------------------------------------------|----------------------|--------------------------|------------------------------|---------|-----------------|
| Time-Window (ms)                                               | t-contrast Direction | Region                   | Peak Coordinates (X,Y,Z MNI) | Z-value | Extent (Voxels) |
| 20:100                                                         | TFUS > No-TFUS       | Right Inferior Frontal   | 44, 28, 5                    | 2.8     | 979             |
| 100:180                                                        | TFUS > No-TFUS       | L pre-SMA                | -10, -10, 50                 | 2.7     | 1108            |
|                                                                |                      | R pre-SMA                | 6, 22, 50                    | 2.67    | 1069            |
|                                                                |                      | R DLPFC                  | 30, 28, 40                   | 2.91    | 850             |
| 180:260                                                        | TFUS > No-TFUS       | Right Inferior Occipital | 50, -70, 8                   | 2.62    | 47              |
| 260:340                                                        | TFUS > No-TFUS       | Left Superior Occipital  | -18, -82, 34                 | 2.34    | 594             |
|                                                                |                      | Right Cuneus             | 18, -70, 32                  | 2.31    | 259             |
|                                                                |                      | Anterior Cingulate       | 8, 6, 24                     | 2.01    | 253             |
|                                                                | TFUS < No-TFUS       | Left Postcentral         | -18, -38, 68                 | 2.02    | 578             |
|                                                                |                      | Right Postcentral        | 26, -24, 70                  | 1.99    | 362             |
| P. Uncorrected Voxel < 0.005 and P. Cluster Uncorrected < 0.05 |                      |                          |                              |         |                 |

1542 Table S2. MNI locations for SS-SS contrasts

1543 *SS-US and TFUS F-contrast.* Here we show brain areas that exhibited differential  
1544 evoked activation according to (1) successful compared to unsuccessful stopping (SS – US F-  
1545 contrast), and (2) which areas were modulated by TFUS (TFUS F-contrast). We computed  
1546 these whole-brain SPM contrasts using a flexible factorial model to implement a repeated-  
1547 measures ANOVA. We examined these contrasts over three time windows that covered the  
1548 time from stop-signal onset till after the range of subject SSRTs. The main result from all of  
1549 these analyses is that the only brain area exhibiting overlap between a significant SS-US and  
1550 TFUS contrast was a right inferior frontal gyrus cluster centered on pars opercularis, during the

1551 20:100 ms time window. This result supports the accuracy of our TFUS manipulation and its  
 1552 effects on inhibition performance. These data are shown in Figures S3-5.

1553

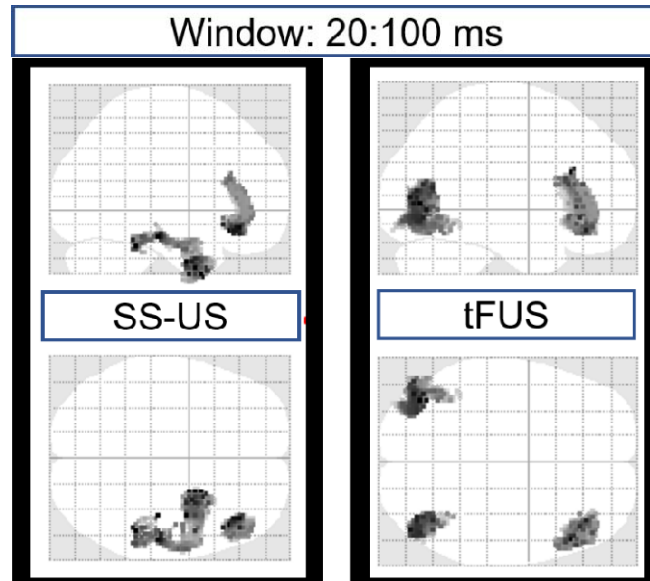

| FWE<br><i>P</i>                                         | Cluster<br>Extent | Uncorr.<br><i>P</i> | Peak-F | X   | Y   | Z   | Cluster Peak         |
|---------------------------------------------------------|-------------------|---------------------|--------|-----|-----|-----|----------------------|
| F-contrast: Successful Stop – Unsuccessful Stop (SS-US) |                   |                     |        |     |     |     |                      |
| <0.005                                                  | 893               | 0.0001              | 16.35  | 50  | -40 | -26 | R Inferior Temporal  |
| <0.05                                                   | 586               | 0.0001              | 15.16  | 54  | 26  | 18  | R Inferior Frontal   |
| F-contrast: non-tFUS – stop-tFUS (tFUS)                 |                   |                     |        |     |     |     |                      |
| <0.01                                                   | 620               | 0.0001              | 16.65  | -42 | -72 | -8  | L Inferior Occipital |
| <0.005                                                  | 899               | 0.0001              | 16.09  | 52  | 18  | 22  | R Inferior Frontal:  |
| <0.01                                                   | 699               | 0.0001              | 15.52  | 48  | -74 | -10 | R Inferior Occipital |

1554

1555 Figure S3. SPM F-contrasts of source evoked power during the 20:100 ms post stop signal  
 1556 window. F-contrasts and their cluster corrected statistics are shown for the SS-US contrast and  
 1557 the contrast of SS trials during non-TFUS and stop-TFUS.

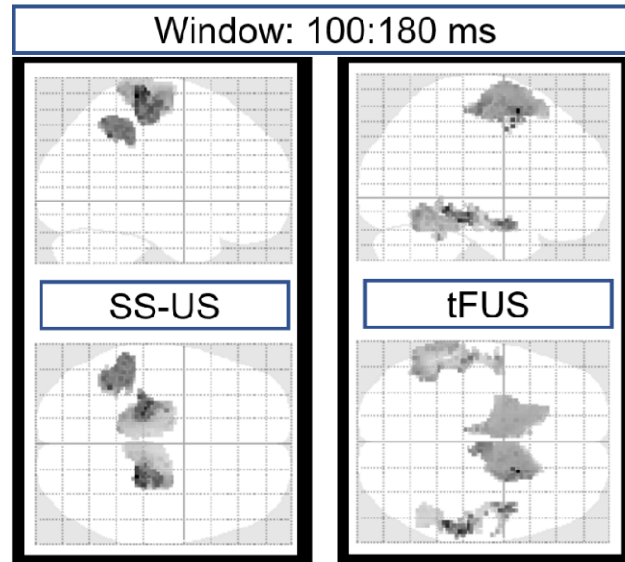

| FWE P                                                   | Cluster Extant | Uncorr. P | Peak-F | X   | Y   | Z   | Cluster Peak        |
|---------------------------------------------------------|----------------|-----------|--------|-----|-----|-----|---------------------|
| F-contrast: Successful Stop – Unsuccessful Stop (SS-US) |                |           |        |     |     |     |                     |
| <0.001                                                  | 1147           | <0.0001   | 24.87  | 24  | -34 | 68  | R Postcentral       |
| <0.0005                                                 | 1279           | <0.0001   | 21.85  | -22 | -28 | 72  | L Pre/Postcentral   |
| <0.05                                                   | 479            | <0.005    | 19.23  | -36 | -52 | 42  | L Inferior Parietal |
| F-contrast: non-tFUS – stop-tFUS (tFUS)                 |                |           |        |     |     |     |                     |
| <0.0001                                                 | 1337           | <0.0001   | 18.41  | 22  | 8   | 56  | R pre-SMA           |
| =0.2                                                    | 343            | <0.01     | 16.15  | 52  | 18  | 22  | R Middle Temporal   |
| <0.05                                                   | 590            | <0.001    | 13.18  | 48  | -74 | -10 | L Middle Temporal   |
| <0.001                                                  | 1113           | <0.0001   | 11.99  | -6  | -28 | 56  | L Precentral        |

1558

1559 Figure S4. SPM F-contrasts of source evoked power during the 100:180 ms post stop signal  
 1560 window. F-contrasts and their cluster corrected statistics are shown for the SS-US contrast and  
 1561 the contrast of SS trials during non-tFUS and stop-tFUS.

1562

1563

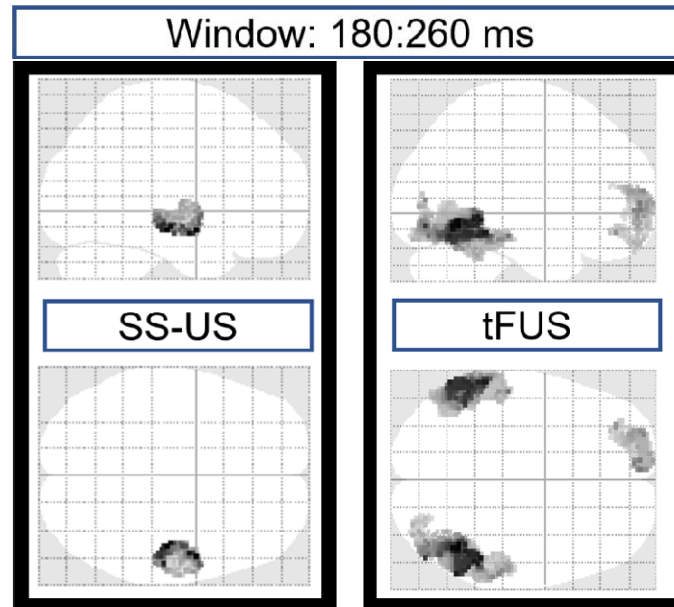

| FWE<br><i>P</i>                                         | Cluster<br>Extant | Uncorr.<br><i>P</i> | Peak-F | X   | Y   | Z   | Cluster Peak              |
|---------------------------------------------------------|-------------------|---------------------|--------|-----|-----|-----|---------------------------|
| F-contrast: Successful Stop – Unsuccessful Stop (SS-US) |                   |                     |        |     |     |     |                           |
| <0.05                                                   | 497               | <0.005              | 16.83  | 46  | -20 | -14 | R Middle Temporal         |
| F-contrast: non-tFUS – stop-tFUS (tFUS)                 |                   |                     |        |     |     |     |                           |
| <0.0001                                                 | 1702              | <0.00001            | 19.64  | 42  | -58 | -10 | R Inferior Temporal       |
| <0.001                                                  | 1270              | <0.0001             | 17.92  | -58 | -40 | -14 | L Middle Temporal         |
| <0.05                                                   | 564               | <0.005              | 13.49  | -4  | 60  | 0   | L Medial Superior Frontal |

1564

1565 Figure S5. SPM F-contrasts of source evoked power during the 180:260 ms post stop signal  
1566 window. F-contrasts and their cluster corrected statistics are shown for the SS-US contrast and  
1567 the contrast of SS trials during non-TFUS and stop-TFUS.

1568

1569 *Interaction t-contrasts.* The most common contrast in analyzing stop-signal neural data  
1570 involves comparing successful to unsuccessful stop activation (SS – US) as we did for the  
1571 above whole-brain analysis. The rationale is based on the assumption that areas directly related  
1572 to stopping/inhibition are more ‘potently’ active in successful trials, and that failed stop trials  
1573 (US) also reflect go activity according to the independent race model of Logan and Cowan  
1574 (1984). This choice of contrast also stems from the fact that typical stop-signal tasks do not offer  
1575 a second set of SS trials for comparison (which our experiment does). Therefore, this raises the  
1576 following question: Did TFUS yield changes in stopping by merely altering what would have



1577 been US Stop-TFUS trials? If TFUS merely raised the overall level of activity across all stop  
 1578 trials, (i.e., SS and US), then we should expect no interactions. We examined the whole-brain  
 1579 SPM interaction across the 4 time windows used in the previous analysis. In each window, we  
 1580 examined the t-contrast interaction that compared for a bigger SS-US difference in either Stop-  
 1581 TFUS or No-TFUS trials. We only found these effects for the 100:180 ms and 180:260 ms  
 1582 window. The interaction t-contrast SPMs and corresponding tables are shown in Figures S6-7.

1583

Window: 100:180 ms

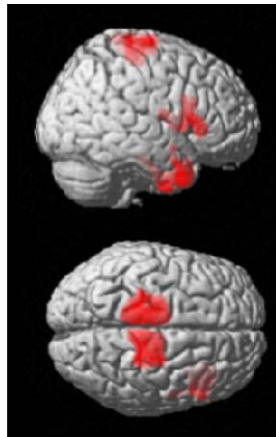

| FWE<br><i>P</i>                                              | Cluster<br>Extent | Uncorr.<br><i>P</i> | Peak-T | X  | Y   | Z   | Cluster Peak                                                  |
|--------------------------------------------------------------|-------------------|---------------------|--------|----|-----|-----|---------------------------------------------------------------|
| F-Contrast: Interaction SS-US (stop-tfUS) > SS-US (non-tfUS) |                   |                     |        |    |     |     |                                                               |
| <0.001                                                       | 1364              | <0.0001             | 4.42   | 52 | -18 | -12 | L Postcentral                                                 |
| <0.005                                                       | 1153              | <0.00001            | 4.41   | 42 | -90 | 4   | R Middle Occipital                                            |
| <0.005                                                       | 988               | <0.00001            | 4.30   | 32 | -4  | 38  | R Inferior Temporal                                           |
| <0.05                                                        | 670               | <0.005              | 3.70   | 44 | 14  | 10  | R Frontal Operculum<br>/Inferior Frontal<br>/Pars Opercularis |

1584

1585 Figure S6. SPM interaction t-contrasts of source evoked power during the 100:180 ms post stop  
 1586 signal window. The t-contrast tested for areas in which the SS-US contrast was higher during  
 1587 stop-TFUS compared to non-TFUS. The cluster corrected statistics are shown are shown below  
 1588 the plot.

1589

1590

Window: 180:260 ms

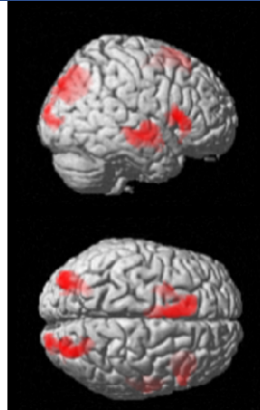

| FWE P                                                        | Cluster Extent | Uncorr. P | Peak-T | X   | Y   | Z   | Cluster Peak                                |
|--------------------------------------------------------------|----------------|-----------|--------|-----|-----|-----|---------------------------------------------|
| F-Contrast: Interaction SS-US (stop-tfUS) > SS-US (non-tfUS) |                |           |        |     |     |     |                                             |
| <0.01                                                        | 706            | <0.001    | 4.21   | 52  | -18 | -12 | R Middle Temporal                           |
| <0.005                                                       | 984            | <0.00001  | 3.90   | 42  | -90 | 4   | R Middle Occipital                          |
| <0.05                                                        | 567            | <0.0001   | 3.73   | 46  | 16  | 4   | R Inferior Frontal Gyrus / Pars Opercularis |
| <0.005                                                       | 822            | <0.001    | 3.61   | -2  | 14  | 64  | pre-SMA/SMA                                 |
| <0.005                                                       | 780            | <0.005    | 3.25   | -34 | -68 | 28  | L Middle Occipital                          |

1591

1592 Figure S7. SPM interaction t-contrasts of source evoked power during the 180:260 ms post stop  
 1593 signal window. The t-contrast tested for areas in which the SS-US contrast was higher during  
 1594 stop-TFUS compared to non-TFUS. The cluster corrected statistics are shown are shown below  
 1595 the plot.

1596

1597 We note that we only found significant contrasts in the latter two time windows, i.e., 100-

1598 180 and 180-260 ms from the Go signal. In both contrasts, the SS-US difference was larger in

1599 the Stop-TFUS conditions. Generally, these results agree with that of the main text examining

1600 just the SS-SS contrast and other studies (Aron and Poldrack, 2006; Boehler et al., 2010).

1601 However, as Boehler et al. (2010) point out, this contrast is conservative which lends itself to

1602 identifying areas primarily involved in successful stopping. It is also unlikely that this

1603 conservative contrast can identify areas involved in the broader stopping network. It is therefore

1604 not surprising that we did not find difference in parietal cortices, for example. Importantly,

1605 though, these results demonstrating mainly activation differences in inferior frontal and occipital

1606 cortices is almost identical to that found in Boehler et al. (2010). This indicates that our results  
1607 generally agree with previous studies using the SS – US contrast.

1608

### 1609 **S7. ROI Interaction analysis**

1610 In the main text we presented a time-based source analysis of the main ROIs of interest,  
1611 including Right IFG, Right pre-SMA, Right DLPFC, Left M1, and Right Inferior Temporal  
1612 cortices. In the main text's analysis, we compared SS trials across TFUS conditions. To address  
1613 the change in time-course activation at the ROI level, we computed the interaction of SS-US  
1614 (no-TFUS) and SS-US (Stop-TFUS) trials using the same MNI locations as used for analyses  
1615 reported in the main text (Fig. S6).

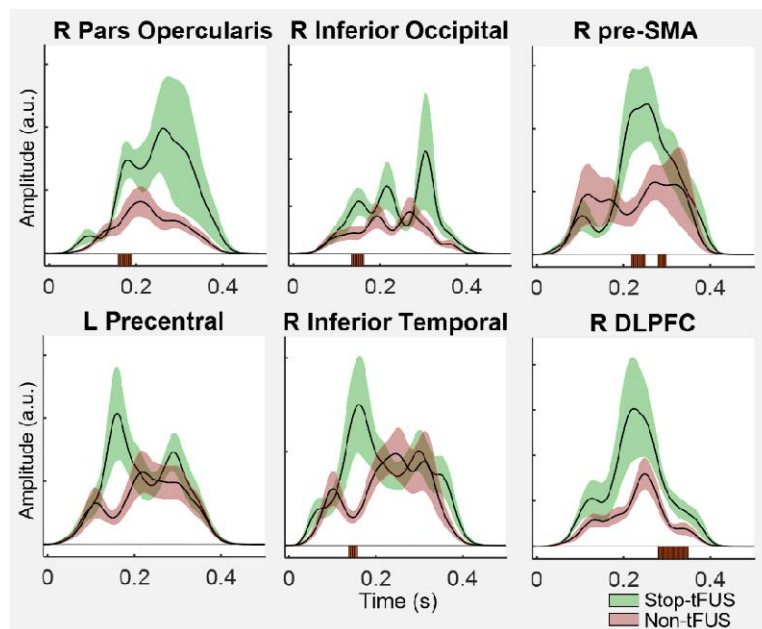

1616

1617 Figure S8. Source-based evoked power time-series for different regions-of-interest listed in the  
1618 figure. Each ROI was extracted with a radius of 6 mm.

1619 Only three of these ROIs are different before the minimum SSRT across TFUS conditions (185

1620 ms). These include pars opercularis, Right Inferior Occipital, and Right inferior temporal ROIs.

1621 This result is mostly in line fMRI (Boehler et al., 2010; Li et al., 2006) and EEG/MEG (Boehler et  
1622 al., 2009; Wessel and Aron, 2015) studies, although previous work has also identified Right  
1623 temporal cortex (Rae et al., 2015; Xu et al., 2017). Nevertheless, previous findings of differential  
1624 temporal cortex activity have been based on comparing SS to Go trials rather than the SS – US  
1625 (and interaction) comparison we used here. Given the DCM and SSRT regression results  
1626 indicating changes in temporal cortex activity – as well as the temporal cortex’s role in visual  
1627 signal in both the top-down and bottom-up processing directions – these results suggest the  
1628 success of stopping may rely on information transfer of node between sensory and prefrontal  
1629 ventral areas, e.g., rIFG. Finally, an interesting result is the lack of difference in r pre-SMA  
1630 before SSRT. Notably, there was differential activation but only after SSRT. This result speaks  
1631 to the broader debate of whether pre-SMA or rIFG lead to stopping in a serial process fashion  
1632 (Aron et al., 2016; Obeso et al., 2013). For example, some studies have suggested that  
1633 information for stopping passes through pre-SMA onto rIFG and vice versa in other accounts.  
1634 These serial accounts, though, forego three factors. First, visual information regarding stop  
1635 contexts are passed up both the ventral and dorsal pathways which inherently project  
1636 separately to rIFG and r pre-SMA, respectively. Second, the prefrontal cortex is likely arranged  
1637 hierarchically with both areas connected with basal ganglia structures, such as the STN and  
1638 striatum. The third comparison is based on considering the current EEG-DCM (main test)  
1639 results to those from other fMRI-DCM and other connectivity results (Jahfari et al., 2017) on  
1640 inhibition. Specifically, the previous bilinear DCM models used in fMRI accounts of response  
1641 inhibition are unlikely to capture the fast-timescale processes that underlies stopping processes.  
1642 Along this same line, though, when considering connectivity as a property of inhibition  
1643 processes, caution should also be used in interpreting temporal precedence of control between  
1644 brain areas based solely on activation. Thus, the above results indicate that the set of expected  
1645 ROIs were differentially modulated by TFUS during SS stopping.

## 1646 **S8. Assessment of possible auditory effects of TFUS**

1647           Recent work examining the effects of TFUS on cortical activity has employed animal  
1648 models to consider the possibility that TFUS may alter activity in auditory pathways. Using a  
1649 single-element transducer and optical imaging on a mouse model, Guo et al. (2018) showed  
1650 that, regardless of the transducer placement and target, TFUS caused activation of the auditory  
1651 pathway. They suggested that this activity may spread cortically and induce artifactual effects of  
1652 TFUS in cortical areas not directly targeted by TFUS. It remains unknown how auditory pathway  
1653 activation via TFUS would yield our behavioral and neural effects. Nevertheless, it is critically  
1654 important to quantify the extent to which auditory pathway activation might have affected our  
1655 results. To address this question, we analyzed source-localized evoked results across the rIFG  
1656 group, as well as S1 and sham rIFG control groups. Because our goal was to determine  
1657 whether TFUS altered the evoked activity with respect to No-TFUS, we compared the time  
1658 courses of source power for stop-locked data by using a source-based ROI of right auditory  
1659 cortex. We used the source location of X: 46, Y: -14, Z: 8 for right auditory cortex, which was  
1660 obtained from Rademacher et al. (2001). These locations were used to extract the eigenvariate  
1661 time-course after source localization in a sphere with radius of 8 mm to be conservative. These  
1662 source-time courses were converted to a pseudo activation using the  $(\exp(\text{SOURCE}) + \exp(-\text{SOURCE})) / 2$   
1663 transform. We used this procedure to ensure we could properly detect differences  
1664 regardless of the ERP activity sign (Fig. S9).

1665           If the behavioral results in the rIFG group were merely the result of changes in auditory  
1666 pathway activity, we should at least see a difference when contrasting the SS-US trials for No-  
1667 TFUS and Stop-TFUS conditions in the rIFG group, or at least across groups. Paired samples t-  
1668 tests did not reveal any significant differences (after false discovery rate correction of  $p < 0.05$ )  
1669 when comparing the time courses of the No-TFUS and Stop-TFUS conditions (Fig. S9).

1670 Therefore, given the spatiotemporal fidelity of EEG, we conclude that our results were not  
1671 contaminated by TFUS artifacts activating the auditory pathway.

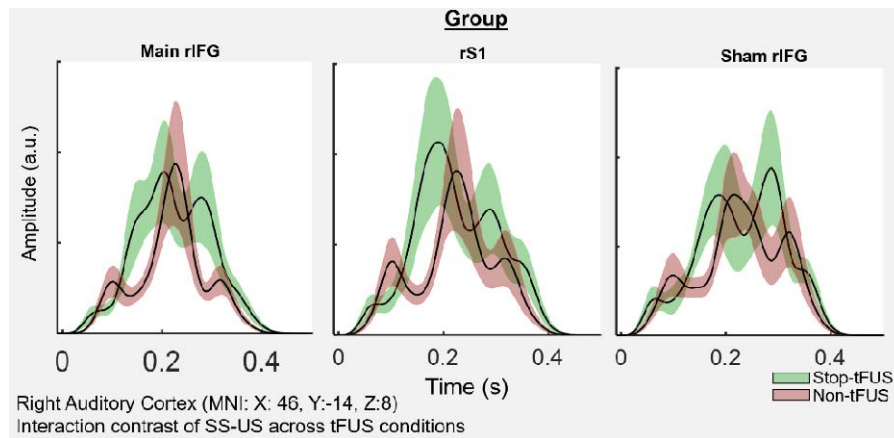

1685 Figure S9. Group source-evoked power time series from right auditory cortex.

1686 Overall, these results suggest that, although TFUS may exert an auditory pathway  
1687 effects measurable in mouse single neurons and LFPs, (1) this activity may not be measurable  
1688 at the macroscopic level, and (2) support the notion that changes in auditory cortical activity  
1689 cannot account for our TFUS-related neural and behavioral effects. Additionally, we note that  
1690 Guo et al. (2018) found that the auditory pathway activation was accompanied by startle-like  
1691 reflexes. Our behavioral results (Fig. 2) are not compatible with a startle release reflex. If that  
1692 were the case, TFUS auditory-related startle activity would likely predict shorter RTs during Go  
1693 trials and failed inhibition Stop trials. The effects of TFUS on our behavioral responses are not  
1694 compatible with the involvement of startle reflexes, as we found no TFUS effects on the Go  
1695 RTs. Therefore, we conclude that the effects of TFUS on stopping behavior, nor processing by  
1696 the cortical and subcortical nodes of the inhibition network, were not induced by artifactual  
1697 stimulation of the auditory pathway.

1698

## 1699 S9. DCM family model hypothesis spaces and results

1700 Below we show the resultant family model posterior probabilities for the family comparisons over  
1701 the 4 factors (3 levels each) for both parametric empirical Bayesian (PEB) GLMs (Figure S10-  
1702 11). PEB GLM model 1 examined the changes in mean connectivity from No-TFUS US to SS  
1703 trials. Changes in mean connectivity represent the gain on connectivity to represent the No-  
1704 TFUS SS trials. PEB GLM model 2 examined the effects of TFUS-induced changes in mean  
1705 connectivity and changes in connectivity that accompanied change in SSRT across subjects.  
1706 Figures S8 and S9 show the changes in connections and family model probabilities for PEB  
1707 model 1. Figure S12 shows the results of tests of the exact same factor space displayed as bar  
1708 plots to represent the family probability of each model separately for the TFUS-induced mean  
1709 and SSRT change in successful inhibition connectivity.

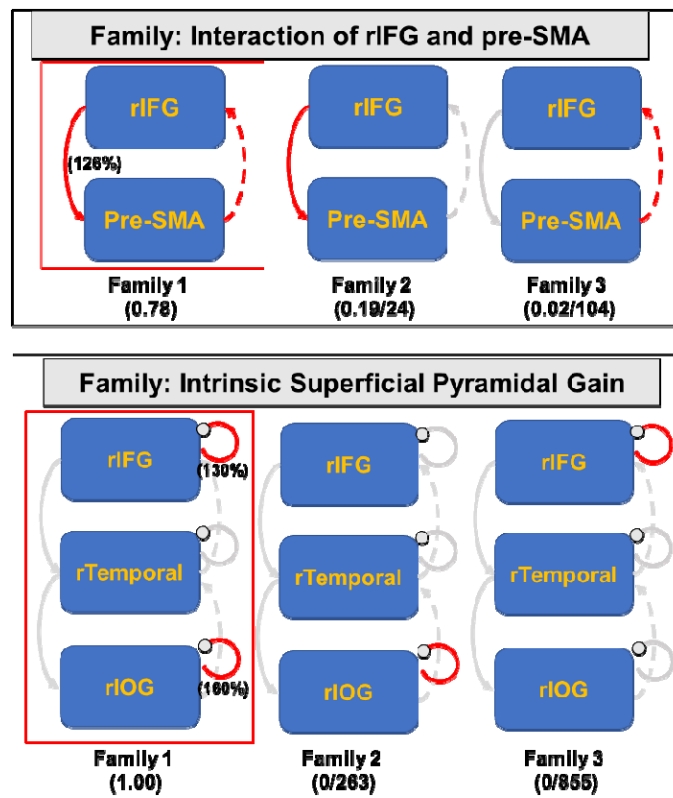

1710

1711 Figure S10. Hypothesis space and results of the Family based PEB Bayesian model  
1712 comparison for different hypotheses. Family-based posterior probability (F-Pp) and the log-

1713 bayes factor with respect to the winning model are listed below each model and were computed  
 1714 as the difference in free energy between families (F-Pp/Log-Bayes). The winning model family is  
 1715 enclosed in a red box. The outcomes of these plots can be interpreted of as revealing the  
 1716 modulatory parameters connections with very strong, positive evidence being different between  
 1717 US and SS trials. Parameters estimates with a greater than 95% posterior probability in these  
 1718 families are presented in parentheses next to the modulated connection. The parameters are  
 1719 presented in exponential form of percentage gain. Values above 100% equates to a parameter  
 1720 increase in SS trials compared to US (and the opposite for values below 100%). Parameters in-  
 1721 active in each model are in a gray color. The top Panel shows the hypothesis test of rIFG and  
 1722 pre-SMA interactions. The bottom panel shows the hypothesis test of intrinsic gains modulation.

1723

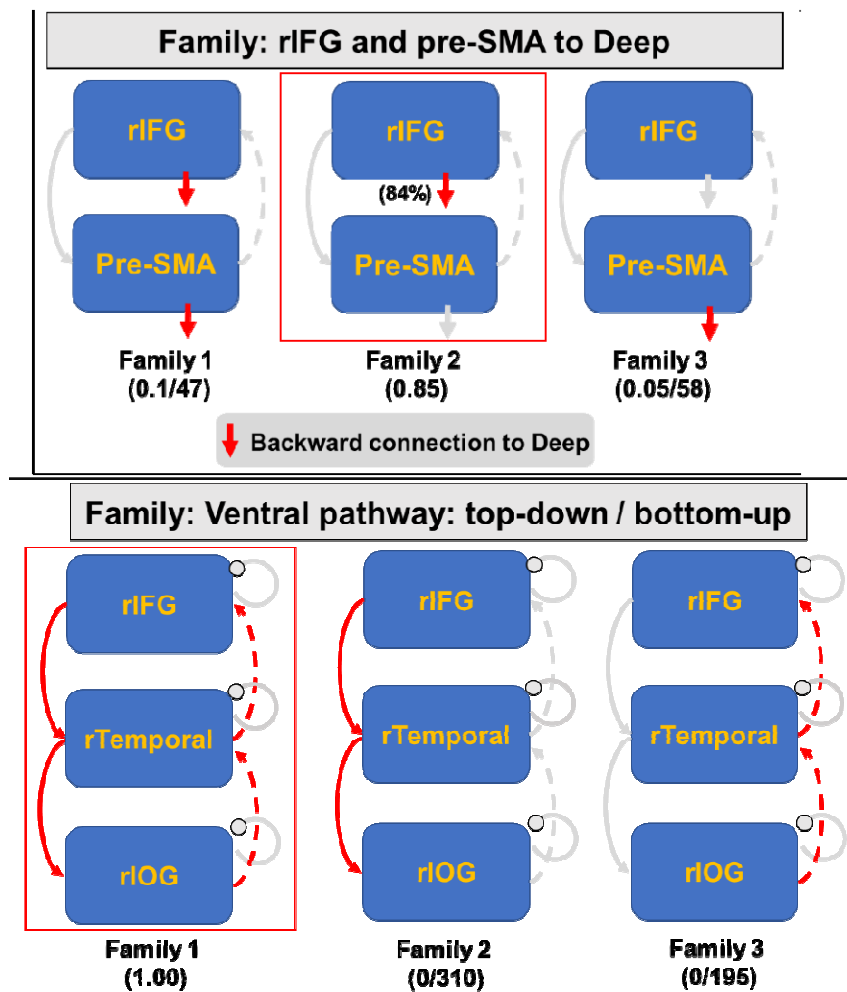

1724

1725 Figure S11. Hypothesis space and results of the Family based PEB Bayesian model  
 1726 comparison for 3 different families comparing hypothetical different interactions between rIFG  
 1727 and the deep node, pre-SMA and the deep node, or both interacting with the deep pathway. The  
 1728 plot is in the same format as Figure S8. Both of these nodes had backward, inhibitory  
 1729 connections with the deep pathway. The top panel compares families comparing the rIFG and  
 1730 pre-SMA to deep backwards connection. The bottom panel compares families testing for  
 1731 differences in top-down v bottom-up connections along the ventral pathway.



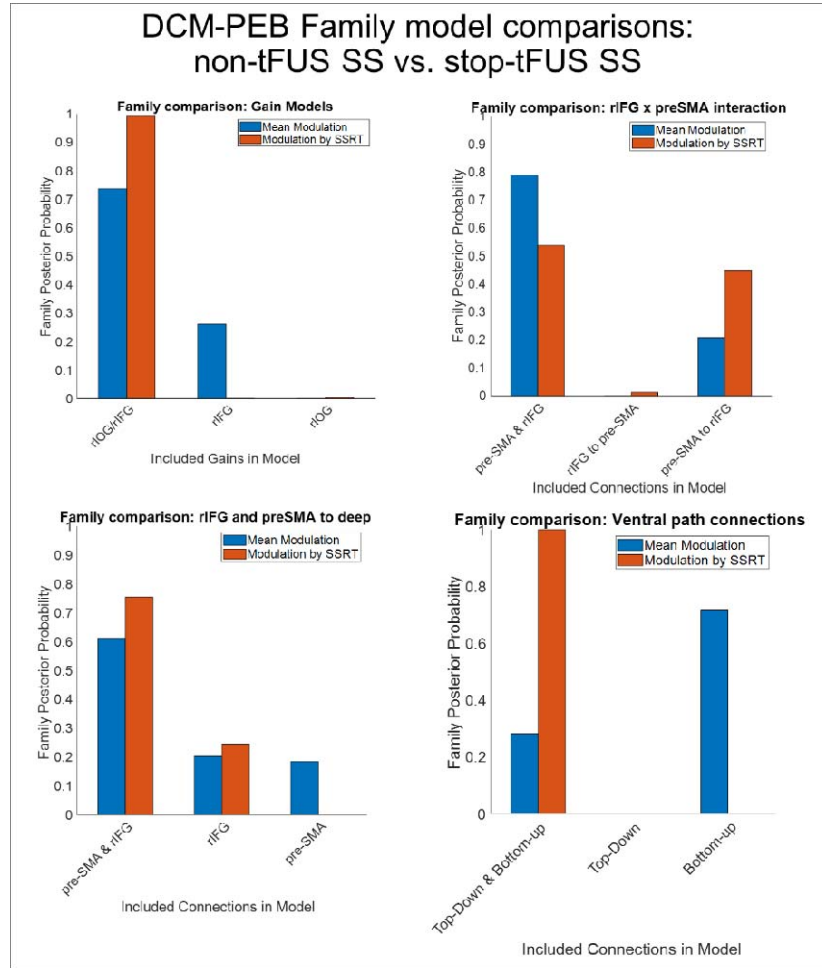

1732

1733

1734 Figure S12. Resultant family posterior probabilities for the comparisons of each factor. Each bar  
 1735 plot shows the marginal probability of each family marginalized separately for changes in the  
 1736 mean connectivity (blue bars) and connectivity changes predicted by TFUS induced changes in  
 1737 SSRT (orange bars). The Bayesian model averaged parameters are presented in the main text.
